1           **NFAT Transcription Factors are Essential and Redundant Actors for Leukemia**  
2                           **Initiating Potential in T-cell Acute Lymphoblastic Leukemia**

3  
4   Claire Catherinet<sup>1-4\*</sup>, Diana Passaro<sup>1-4, 5\*</sup>, Stéphanie Gachet<sup>1-4, 6\*</sup>, Hind Medyouf<sup>1-4, 7</sup>, Anne  
5   Reynaud<sup>1-4</sup>, Charlène Lasgi<sup>8</sup>, Jacques Ghysdael<sup>1-4, 9</sup> & Christine Tran Quang<sup>1-4, 9</sup> &

6   <sup>1</sup> Institut Curie, Orsay, France; <sup>2</sup> CNRS UMR3348, Centre Universitaire, Orsay, France;  
7   <sup>3</sup> University Paris-Saclay, Orsay, France; <sup>4</sup> PSL Research University, Paris, France; <sup>8</sup>  
8   Cytometry Platform, Institut Curie, Orsay, France, <sup>9</sup> INSERM U1278 Centre Universitaire,  
9   Orsay, France

10   Present address: <sup>5</sup> INSERM-U1016, Cochin Institut, Paris France; <sup>6</sup> U944/UMR 7212 St-  
11   Louis Hospital, Paris, France; <sup>7</sup> Institute for Tumor Biology and Experimental Therapy,  
12   Frankfurt am Main, Germany

13   Corresponding authors: [Christine.tran-quang@curie.fr](mailto:Christine.tran-quang@curie.fr); [Jacques.Ghysdael@curie.fr](mailto:Jacques.Ghysdael@curie.fr)

14

- 15       • \* These authors contributed equally to this work.  
16       • & co-corresponding authors

17

18   **Running Title:** NFAT transcription factors are essentials in T-ALL

19

20

21 **ABSTRACT**

22 T-cell acute lymphoblastic leukemia (T-ALL) is an aggressive malignancy with few  
23 available targeted therapies. We previously reported that the phosphatase calcineurin (Cn) is  
24 required for LIC (leukemia Initiating Capacity) potential of T-ALL pointing to Cn as an  
25 interesting therapeutic target. Calcineurin inhibitors have however unwanted side effect. NFAT  
26 transcription factors play crucial roles downstream of calcineurin during thymocyte  
27 development, T cell differentiation, activation and anergy. Here we elucidate NFAT functional  
28 relevance in T-ALL. Using murine T-ALL models in which *Nfat* genes can be inactivated either  
29 singly or in combination, we show that NFATs are required for T-ALL LIC potential and  
30 essential to survival, proliferation and migration of T-ALL cells. We also demonstrate that *Nfat*  
31 genes are functionally redundant in T-ALL and identified a node of genes commonly  
32 deregulated upon Cn or NFAT inactivation, which may serve as future candidate targets for T-  
33 ALL.

34

## 35 INTRODUCTION

36

37 T-cell acute lymphoblastic leukemia (T-ALL) is an aggressive malignancy of T-cell  
38 progenitors that represents about 15% of pediatric and 25% of adult acute lymphoblastic  
39 leukemia cases. Genome-wide transcriptional profiling analysis enabled to classify T-ALL into  
40 different molecular subgroups characterized by abnormal expression of several transcription  
41 factors including TAL1/2, LMO1/2, TLX1/3, NKX2.1/2.2, HOXA, as the result of genetic  
42 rearrangements or other modes of deregulation (for review <sup>1</sup>). Another T-ALL subgroup  
43 encompasses cases characterized by a transcriptional signature resembling that of early T cell  
44 progenitors (ETP subgroup). Across these subgroups, a number of additional, recurrent  
45 alterations are found in tumor suppressor genes/loci, including *CDKN2A* or *PTEN* and in  
46 oncogenes, most notably *NOTCH1*, which harbors functionally relevant activating mutations in  
47 the majority of T-ALL cases <sup>2, 3</sup>

48 Besides genetic and epigenetic oncogenic cues, T-ALL development also depends upon  
49 specific micro-environmental signals (for review <sup>4</sup>). Recent evidence has shown that bone  
50 marrow (BM)-stroma produced CXCL12 acting through its CXCR4 receptor on T-ALL cells  
51 is essential to leukemia development and initiating potential <sup>5, 6</sup>. We notably found that cell-  
52 surface expression of CXCR4 in T-ALL depends upon the activation of calcineurin (PPP3,  
53 named Cn thereafter) <sup>6</sup>, a calcium-dependent phosphatase that we previously showed to be  
54 critical to T-ALL cell survival, proliferation, migratory activity and leukemia initiating  
55 potential <sup>7, 8</sup>. However, these studies also showed that restoring normal CXCR4 cell surface  
56 expression in Cn-deficient T-ALL failed to correct their impaired leukemia initiating potential  
57 <sup>6</sup>, indicating the existence of other Cn effectors critical to T-ALL biology.

58 NFAT transcription factors are important effectors of calcium/calcineurin signaling in  
59 normal T cell development and in many aspects of mature T cell functions (for review, <sup>9</sup>). NFAT  
60 factors are composed of a DNA binding domain structurally related to that of the REL/NFkB

61 family protein, a regulatory domain in which 12-14 serine residues located in specific regions  
62 (SRR1; SP1-SP3) are targeted for phosphorylation and N- and C-terminal activation domains  
63 <sup>9</sup>. In unstimulated cells, NFAT proteins are hyperphosphorylated in their SRR/SP motifs by the  
64 cooperative action of several protein kinases, including glycogen synthase kinase 3 (GSK3),  
65 casein kinase 1 (CK1) and dual specificity tyrosine phosphorylation-regulated kinases (DYRK)  
66 <sup>9</sup> and are sequestered as a supramolecular cytoplasmic complex <sup>10</sup>. Stimuli increasing calcium  
67 concentration and resulting in calcineurin activation lead to dephosphorylation of NFAT  
68 factors, resulting in their nuclear translocation and transcriptional activity <sup>9</sup>.

69 Three members of the *Nfat* gene family, namely *Nfat1*, *Nfat2* and *Nfat4* are expressed  
70 in the T cell lineage and regulate many aspects of T cell functions. Although the picture is far  
71 from being complete, biochemical and gene inactivation studies have enlightened both specific,  
72 redundant or antagonistic functions of these genes in thymocyte development and mature T cell  
73 functions <sup>11, 12, 13, 14, 15, 16, 17</sup>.

74 In this study, we show that *Nfat1*, *Nfat2* and *Nfat4* are critical effectors of calcineurin in T-ALL  
75 that act mostly in a redundant fashion in regulating leukemia initiating potential and the  
76 expression of several genes/pathways that could mediate the pro-oncogenic properties of  
77 Cn/NFAT activation.

78

79

80

## 81 **RESULTS**

82

### 83 **NFAT transcription factors are required for T-ALL leukemia initiating potential**

84 We have previously shown that three NFAT factors, namely NFAT1, NFAT2 and NFAT4  
85 are expressed and activated (dephosphorylated) in primary mouse T-ALL and diagnostic  
86 human T-ALL cases xenografted in NSG mice <sup>7, 8</sup>. Given the prominent role of NFAT1 in  
87 progression of solid tumors <sup>18</sup>, we evaluated T-ALL onset in TEL (ETV6)-JAK2 transgenic  
88 mice <sup>19</sup> that are either wild-type or deficient for *Nfat1*. As reported previously, expression  
89 of the *TEL-JAK2* fusion oncogene in mouse lymphoid lineage induced T-ALL with high  
90 penetrance. We found no difference in T-ALL onset and penetrance between *Nfat1*-  
91 proficient and *Nfat1*-deficient mice (Figure 1A). Likewise, *Nfat1* inactivation failed to  
92 impact upon T-ALL onset and penetrance <sup>20</sup> in the well characterized ICN1 (activated  
93 NOTCH1 allele)-induced T-ALL model (Figure 1B). These data indicate that *Nfat1* is  
94 dispensable for T-ALL development.

Figure 1

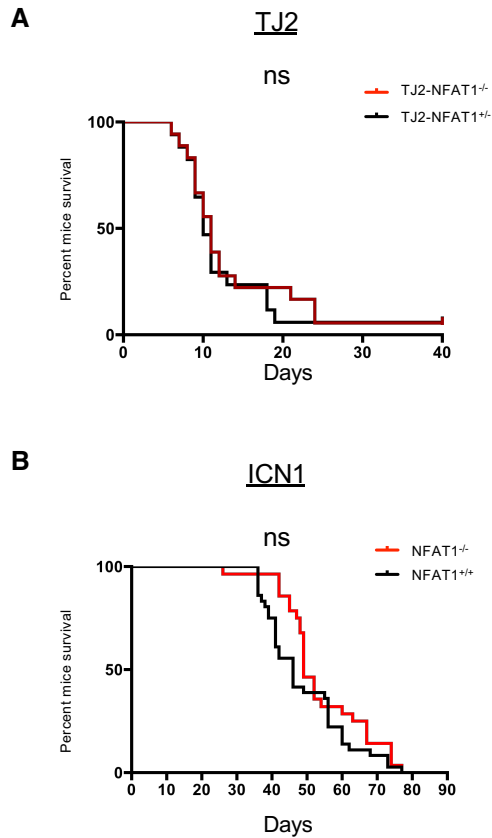

95

96 **Figure 1. *Nfat1* gene inactivation does not affect leukemia development in TEL-JAK2 and ICN1-induced T-**

97 **ALL. (A)** TEL-JAK2 transgenic mice were crossed and backcrossed with mice inactivated for *Nfat1* to generate

98 cohorts of TEL-JAK2<sup>+0</sup>; *Nfat1*<sup>+/-</sup> (n=17) and TEL-JAK2<sup>+0</sup>; *Nfat1*<sup>-/-</sup> (n=18) littermates. These cohorts were

99 followed over time for T-ALL onset and mouse survival (log-rank test; ns: non significant). **(B)** Mice carrying

100 ICN1-induced T-ALL of the indicated genotypes (*Nfat1*<sup>+/+</sup>, n=35; *Nfat1*<sup>-/-</sup>, n=28) were followed over time for T-

101 ALL onset and recipient mice survival (log-rank test; ns : non significant).

102

103 To assess the importance of the other NFAT factors in T-ALL, we next generated *Nfat1*-

104 deficient ICN1-driven T-ALLs carrying conditional, floxed alleles of *Nfat2* and *Nfat4* and

105 the Rosa-Cre-ERT2 transgene (RC<sup>T2</sup>) (see Materiel and Methods) to ultimately compare

106 the leukemia initiating potential (LIC activity) of NFAT-proficient and NFAT-deficient T-

107 ALL cells. Three independent primary T-ALL (#21; #23; #24) of this genotype were thus  
108 injected into wild type secondary recipient mice. Sub-terminally leukemic mice were  
109 treated either with carrier solvent (So) or with tamoxifen (Tam) to induce Cre-mediated  
110 deletion of *Nfat2* and *Nfat4* (see Figure 2A for a scheme of the experiment). Genotyping of  
111 leukemic cells retrieved from mice 5 days later showed efficient deletion of the *Nfat4*  
112 floxed alleles (Figure 2B) associated with undetectable NFAT4 protein expression (Figure  
113 2C) and a clear but incomplete deletion of *Nfat2* accompanied by a strong decrease in  
114 NFAT2 protein isoforms expression (Figures 2B and C). In this experimental setting in  
115 which loss of NFAT expression was experienced for about 2 days by leukemic cells (see  
116 Methods), we observed no effect on tumor burden and leukemic cell survival  
117 (Supplementary Figure 1A and B). Comparison of LIC activity of such generated *Nfat*-  
118 deficient cells with their respective *Nfat*-proficient leukemic cells was next investigated  
119 by transplantation under limit dilution conditions into new hosts and monitoring of  
120 leukemia recurrence and mouse survival (Figure 2A for a scheme). While  $10^4$  (T-ALL #21)  
121 or  $10^3$  (T-ALL #23; #24) *Nfat*-proficient cells were sufficient to re-initiate leukemia in all  
122 recipients, none (T-ALL #21, #24) or only 1/6 recipient mice (T-ALL #23) infused with  
123 the same number of *Nfat*-deficient T-ALL cells succumbed to leukemia (Figure 2D and  
124 Table 1). The differential phenotype between *Nfat*-proficient and *Nfat*-deficient leukemic  
125 cells did not result from a non-specific, toxic effect of tamoxifen treatment or Cre  
126 activation since the leukemia initiating potential of ICN1-driven T-ALL that are wild type  
127 for all 3 *Nfat* genes and that carry the  $RC^{T2}$  transgene is unaffected by Tam treatment  
128 (Supplementary Figure 2; Supplementary Table1). These results demonstrate that  
129 inactivation of NFAT function impairs the leukemia initiating potential of T-ALL cells.

Figure 2

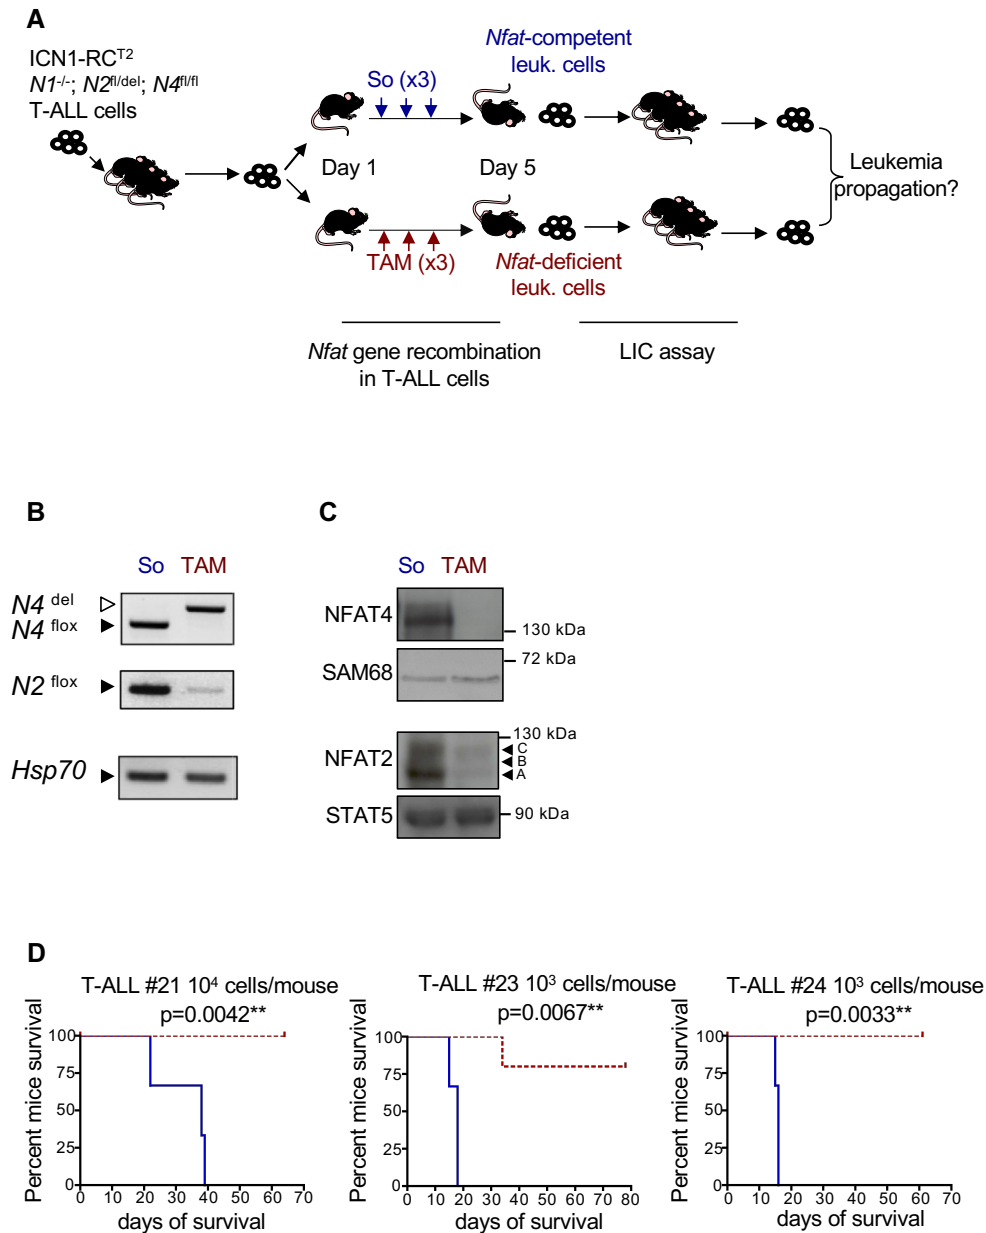

130

131 **Figure 2. NFAT factors are required for leukemic initiating cell potential in T-ALL.** (A) Schematic  
 132 description of the experiment: Mice were i.v. injected with ICN1-induced leukemic cells obtained from 3  
 133 independent T-ALL (#21, #23, #24) of the indicated genotypes. When BM leukemia burden reached about 10-  
 134 15% leukemic cells in these recipients, mice received 3 successive daily injection of either carrier solvent (So,  
 135 n=3) or tamoxifen (TAM, n=6) to induce *Nfat2* and *Nfat4* floxed alleles deletion. Mice from both groups  
 136 terminally ill 2 days later and were sacrificed. *Nfat*-proficient (blue label, 1) and *Nfat*-deficient (red label, 2)  
 137 leukemic cells were flow cytometry-sorted (tNGFR<sup>+</sup> cells), genotyped for *Nfat* floxed (flox) and deleted (del)



138 alleles and compared for their ability to re-initiate leukemia in wild-type secondary recipient mice under limit  
 139 dilution conditions. *N1*: *Nfat1*; *N2*: *Nfat2*; *N4*: *Nfat4*;  $RC^{T2}$ : Rosa-Cre-ER<sup>T2</sup> transgene; ICN1: intracellular  
 140 NOTCH1; LIC: leukemia initiating cell. **(B)** PCR-based genotyping for *Nfat2* and *Nfat4* floxed and deleted alleles  
 141 in tNGFR+ T-ALL cells obtained from mice treated with So (1) or Tam (2), as schematized in panel A. **(C)** Western  
 142 blot analysis of NFAT2 and NFAT4 expression in leukemic cells of mice treated with So (1) or Tam (2), as  
 143 schematized in panel A. SAM68 and STAT5 expression are used as loading controls. Arrowheads indicate the A,  
 144 B and C NFAT2 isoforms. **(D)** Kaplan-Meier survival curve of mice infused with  $1 \times 10^4$  (T-ALL #21) or  $1 \times 10^3$   
 145 (T-ALL #23; 24) *Nfat*-proficient (blue tracing) or *Nfat*-deficient (red tracing) cells as described in (A). Mice were  
 146 followed overtime for T-ALL recurrence and recipient mice survival (n=3-6; log-rank test).  
 147

**Table 1**

| Leukemia id | Treatment of donor mice | Number of cells injected in recipients | Number of injected recipients | Number of leukemic recipients (time to death, days) | Statistics | % leukemic cells in the BM $\pm$ SEM of recipients |
|-------------|-------------------------|----------------------------------------|-------------------------------|-----------------------------------------------------|------------|----------------------------------------------------|
| #21         | So                      | $4 \cdot 10^6$                         | 3                             | 3 (13 ;13 ;13)                                      | p=0,025    | 63,9 $\pm$ 6                                       |
|             | TAM                     | $4 \cdot 10^6$                         | 3                             | <b>3*</b> (17 ;17 ;17)                              |            | 64,9 $\pm$ 2,8                                     |
|             | So                      | $1 \cdot 10^4$                         | 3                             | 3 (22 ;39 ;38)                                      | p=0,004    | 46,2 $\pm$ 13,4                                    |
|             | TAM                     | $1 \cdot 10^4$                         | 6                             | 0                                                   |            | NA                                                 |
|             | So                      | $1 \cdot 10^3$                         | 3                             | 1 (21)                                              | ns         | 65,9                                               |
|             | TAM                     | $1 \cdot 10^3$                         | 6                             | 0                                                   |            | NA                                                 |
| #23         | So                      | $4 \cdot 10^6$                         | 3                             | 3 (13 ;14 ;13)                                      | p=0.004    | 47,6 $\pm$ 2,9                                     |
|             | TAM                     | $4 \cdot 10^6$                         | 5                             | <b>5*</b> (20 ;20 ;25 ;22 ;29)                      |            | 42,9 $\pm$ 3,9                                     |
|             | So                      | $1 \cdot 10^4$                         | 3                             | 3 (14 ;15 ;18)                                      | p=0,001    | 38,1 $\pm$ 11,1                                    |
|             | TAM                     | $1 \cdot 10^4$                         | 6                             | <b>6*</b> (22 ;25 ;25 ;25 ;29 ;52)                  |            | 37,6 $\pm$ 13                                      |
|             | So                      | $1 \cdot 10^3$                         | 3                             | 3 (18 ;15 ;18)                                      | p=0,006    | 36,2 $\pm$ 9,1                                     |
|             | TAM                     | $1 \cdot 10^3$                         | 6                             | <b>1*</b> (34)                                      |            | 49,3                                               |
| #24         | So                      | $4 \cdot 10^6$                         | 3                             | 3 (15 ;15 ;15)                                      | p=0,004    | 58,8 $\pm$ 5,7                                     |
|             | TAM                     | $4 \cdot 10^6$                         | 6                             | <b>6*</b> (17 ;17 ;18 ;18 ;18 ;23)                  |            | 42,4 $\pm$ 5,5                                     |
|             | So                      | $1 \cdot 10^4$                         | 3                             | 3 (15 ;15 ;15)                                      | p=0,004    | 31,3 $\pm$ 3                                       |
|             | TAM                     | $1 \cdot 10^4$                         | 6                             | <b>2*</b> (18 ;37)                                  |            | 39,4 $\pm$ 8,1                                     |
|             | So                      | $1 \cdot 10^3$                         | 3                             | 3 (15 ;15 ;16)                                      | p=0,003    | 9 $\pm$ 1,6                                        |
|             | TAM                     | $1 \cdot 10^3$                         | 6                             | 0                                                   |            | NA                                                 |

148 **Table 1.** Comparison of the leukemia initiating potential of *Nfat*-proficient and *Nfat*-deficient versions of T-ALL  
 149 #21, #23, and #24, generated as schematized in Figure 1A

150

151

152 We next investigated whether NFAT transcription factors were involved in the control of  
153 survival, proliferation and migration of leukemic cells in these conditions, as previously  
154 observed for calcineurin. For this, ICN1; RC<sup>T2</sup>; *Nfat1*<sup>-/-</sup>; *Nfat2*<sup>fl/del</sup>; *Nfat4*<sup>fl/fl</sup> T-ALL cells were  
155 treated either with 4-hydroxytamoxifen (4OHT) to induce deletion of *Nfat2* and *Nfat4* or  
156 with the carrier solvent (Et), as control and co-cultivated with MS5 stromal cells<sup>6, 8</sup>. *Nfat*  
157 inactivation (Figure 3A) was accompanied by impaired S phase progression as measured  
158 by BrdU pulse-labeling (Figure 3B), increased apoptosis as analyzed by caspase 3  
159 activation (Figure 3C) and decreased cell migration as determined by time lapse  
160 videomicroscopy (Figure 3D). In contrast, ICN1; RC<sup>T2</sup>; *Nfat1*<sup>+/+</sup>; *Nfat2*<sup>+/+</sup>; *Nfat4*<sup>+/+</sup> T-ALL  
161 cell migration, survival and proliferation were not affected by 4OHT treatment (data not  
162 shown), showing the specificity of the observed phenotypes.

163

Figure 3

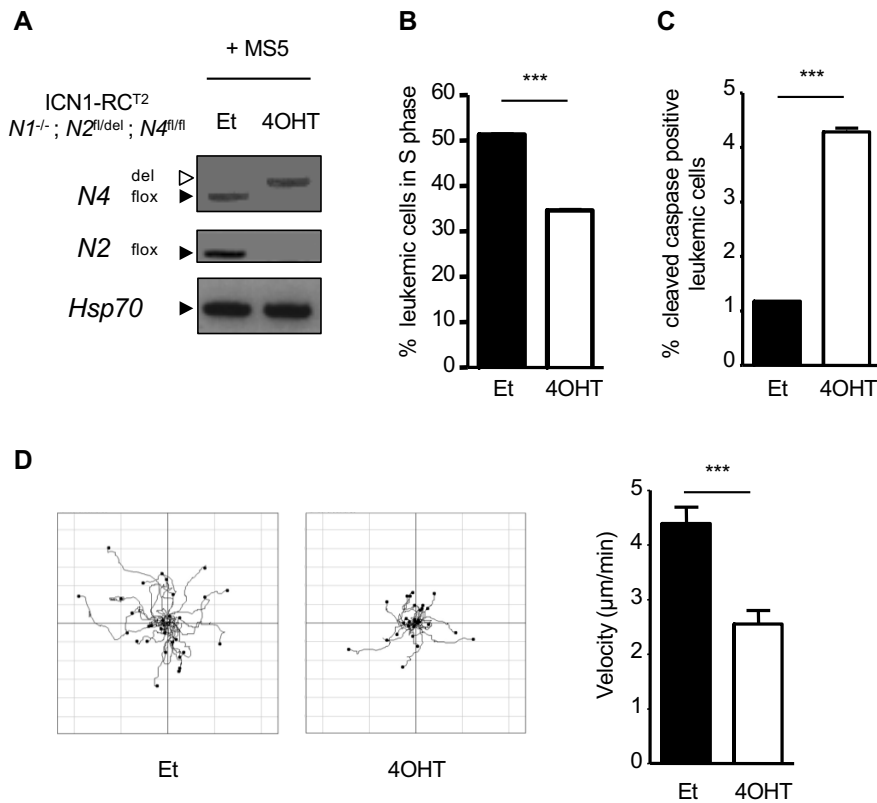

164

165 **Figure 3. NFAT transcription factors regulate cell survival, proliferation and migration of ICN1-induced**

166 **T-ALL *in vitro*.** (A) T-ALL #21 leukemic cells were co-cultured on MS5 stromal cells and treated with solvent

167 (ethanol, Et) or 4OHT to induce deletion of *Nfat* floxed alleles. Leukemic cells genotypes were analyzed 5 days

168 later by PCR for the floxed (flox) and deleted (del) alleles of *Nfat4* and the floxed allele of *Nfat2*. PCR for *Hsp70*

169 is used as control. (B) BrdU pulse-labeling analysis *Nfat*-proficient and *Nfat*-deficient 5 days after ethanol or 4OHT

170 treatment, respectively. Percentage BrdU-positive leukemic cells is presented (data are represented as  $\pm$  SEM ;

171  $n=3$ ; Student's t-test ; \*\*\*  $p<0,001$ ). (C) At the same time point, *Nfat*-proficient (black) and *Nfat*-deficient (white)

172 leukemic cells were analyzed for percentage of cells positive for cleaved caspase 3 (data are represented as mean

173  $\pm$  SEM ;  $n=3$  ; Student's t-test ; \*\*\*  $p<0,001$ ). (D) At the same time point, *Nfat*-proficient and *Nfat*-deficient

174 leukemic cells were seeded on MS5 stromal cells and migration of individual cells ( $n=30$ ) recorded for 15 minutes

175 by time-lapse videomicroscopy. In the flower plot diagrams (left), the starting point of each track is placed at the

176 axis origins. In the right panel, velocity ( $\mu\text{m}/\text{min}$ ) of *Nfat*-proficient (Et) versus *Nfat*-deficient (4OHT) leukemic

177 cell was compared (data are represented as mean  $\pm$  SEM ;  $n=3$  ; Student's t-test \*\*\*  $p<0,001$ ).

178

179 **NFAT transcription factors have redundant functions in T-ALL**

180 Given their redundant, agonistic or antagonistic roles during T cell development, we next  
181 investigated whether expression of individual members of the NFAT family would be  
182 sufficient to sustain leukemia initiating potential of T-ALL cells. To this end, we generated  
183 ICN1-driven tumors in which only *Nfat4* (ICN1; RC<sup>T2</sup>; *Nfat1*<sup>-/-</sup>; *Nfat2*<sup>fl/fl</sup>; *Nfat4*<sup>+/+</sup>) or only  
184 *Nfat2* (ICN1; RC<sup>T2</sup>; *Nfat1*<sup>-/-</sup>; *Nfat2*<sup>+/+</sup>; *Nfat4*<sup>fl/fl</sup>) will remain expressed following genetic  
185 inactivation of the other family members. Of note, in this experimental setting neither the  
186 loss of NFAT2 nor that of NFAT4 for about 2 days in leukemic cells (see Materiel and  
187 Methods) impacted tumor burden (Supplementary Figure 3A and B). We next analyzed  
188 the leukemia initiating potential of these cells (see Figure 4A for a scheme of the  
189 experiment). When injected under limiting dilution conditions, the LIC potential of T-ALL  
190 cells expressing only *Nfat4* was comparable to that of cells expressing both *Nfat2* and  
191 *Nfat4* (Figure 4B, left panel, compare red and blue tracings; Table 2). Of note, T-ALL cells  
192 recovered from terminally leukemic recipient mice injected with RC<sup>T2</sup>; *Nfat1*<sup>-/-</sup>;  
193 *Nfat2*<sup>del/del</sup>; *Nfat4*<sup>+/+</sup> T-ALL cells kept their original *Nfat* genotypes (Figure 4C, left panel),  
194 indicating that the mere expression of NFAT4 is sufficient to maintain the LIC potential of  
195 T-ALL. Likewise, recipient mice injected under limit dilution conditions with leukemic  
196 cells expressing only *Nfat2* all succumbed to T-ALL, although with a slight delay as  
197 compared to mice infused with their respective control (Figure 4B, right panel compare  
198 red and blue tracings; Table 2). Leukemic cells recovered from terminally-leukemic  
199 recipients injected with RC<sup>T2</sup>; *Nfat1*<sup>-/-</sup>; *Nfat2*<sup>+/+</sup>; *Nfat4*<sup>del/del</sup> T-ALL kept their original *Nfat*  
200 genotypes (Figure 4C; right panels), showing that LIC activity was effectively driven by  
201 NFAT2. Taken together, these experiments show that NFAT factors play an essential and  
202 redundant role in the leukemia initiating potential of T-ALL cells.

Figure 4

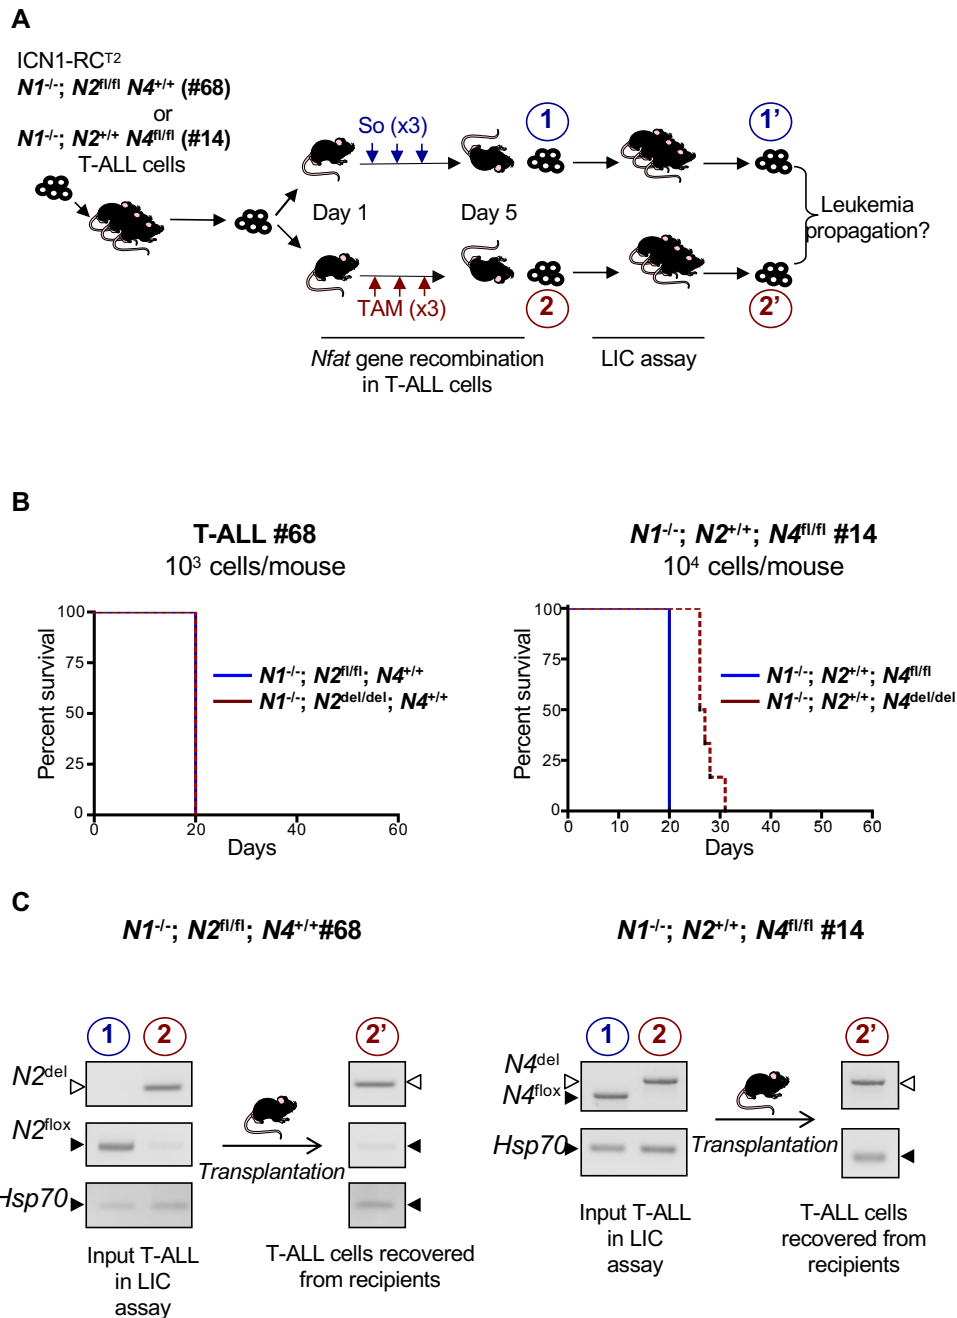

203

204 **Figure 4. Functional redundancy of NFAT factors in T-ALL. (A)** Schematic description of the experiment:

205 mice were injected with leukemic cells obtained from either primary T-ALL #68 (ICN1; RCT2; *Nfat1*<sup>-/-</sup>; *Nfat2*<sup>fl/fl</sup>;

206 *Nfat4*<sup>+/+</sup>) or #14 (ICN1; RCT2; *Nfat1*<sup>-/-</sup>; *Nfat2*<sup>+/+</sup>; *Nfat4*<sup>fl/fl</sup>), that carry wild type alleles of *Nfat4* or *Nfat2*,

207 respectively. When BM leukemia burden reached about 10-15% T-ALL cells in these recipients, mice received 3

208 successive daily injection of either carrier solvent (So, n=3) or Tamoxifen (TAM, n=6) to induce *Nfat2* (T-ALL

209 #68) or *Nfat4* (T-ALL #14) floxed alleles deletion thus resulting in T-ALLs relying upon only *Nfat4* (T-ALL #68)

210 or only *Nfat 2* (T-ALL #14). Mice from all groups became terminally leukemic 2 days later and *Nfat*-proficient

211 (blue label, 1) or *Nfat*-defloxed (red label, 2) cells were flow cytometry-sorted and compared for their ability to  
 212 re-initiate leukemia in secondary recipient mice under limit dilution conditions. Flow cytometry-sorted leukemic  
 213 cells obtained from donor mice (1, 2) and retrieved from terminally ill recipients (1', 2') were genotyped for *Nfat*  
 214 floxed and deleted alleles. **(B)** Left panel: Kaplan-Meier survival curves of mice transplanted with T-ALL cells  
 215 #68 expressing only *Nfat4* (red tracing) or co-expressing *Nfat2* and *Nfat4* (blue tracing). Right panel: Kaplan-  
 216 Meier survival curves of mice transplanted with T-ALL cells #14 expressing only *Nfat2* (red tracing) or co-  
 217 expressing *Nfat2* and *Nfat4* (blue tracing). **(C)** Left panels: PCR genotyping of *Nfat2* floxed and deleted alleles in  
 218 input leukemic cells from T-ALL #68 (1 and 2; see schematic in A) and in leukemic cells recovered from one  
 219 representative secondary recipient injected T-ALL cells (T-ALL #68, 2'). Right panels: PCR genotyping of *Nfat4*  
 220 floxed and deleted alleles in input leukemic cells from T-ALL #14 (1 and 2; see schematic in A) and in leukemic  
 221 cells recovered from one representative secondary recipient injected with T-ALL #14 (2'). PCR for *Hsp70* is used  
 222 as control.  
 223

**Table 2**

| Leukemia id                                                        | Treatment of donor mice | Number of cells injected in recipients | Number of injected recipients | Number of engrafted recipients (time to death, days) | Statistics | % leukemic cells in the BM $\pm$ SEM of recipients |
|--------------------------------------------------------------------|-------------------------|----------------------------------------|-------------------------------|------------------------------------------------------|------------|----------------------------------------------------|
| N1 <sup>-/-</sup> ; N2 <sup>fl/fl</sup> ; N4 <sup>+/+</sup><br>#68 | So                      | 1.10 <sup>6</sup>                      | 3                             | 3 (10 ;10 ;10)                                       | ns         | 32,6 $\pm$ 2,2                                     |
|                                                                    | TAM                     | 1.10 <sup>6</sup>                      | 6                             | 6 (10 ;10 ;10 ;10 ;10 ;10)                           |            | 26,6 $\pm$ 1                                       |
|                                                                    | So                      | 1.10 <sup>4</sup>                      | 3                             | 3 (16 ;16 ;16)                                       | ns         | 35,1 $\pm$ 1,4                                     |
|                                                                    | TAM                     | 1.10 <sup>4</sup>                      | 6                             | 6 (16 ;16 ;16 ;17 ;17 ;17)                           |            | 30,9 $\pm$ 3,2                                     |
|                                                                    | So                      | 1.10 <sup>3</sup>                      | 3                             | 3 (20 ;20 ;20)                                       | ns         | 34,2 $\pm$ 3,4                                     |
|                                                                    | TAM                     | 1.10 <sup>3</sup>                      | 5                             | 5 (20 ;20 ;20 ;20 ;20)                               |            | 30,7 $\pm$ 1,5                                     |
|                                                                    | So                      | 1.10 <sup>2</sup>                      | 3                             | 2 (20 ;31)                                           | ns         | 38,8 $\pm$ 5,1                                     |
|                                                                    | TAM                     | 1.10 <sup>2</sup>                      | 6                             | 4 (20 ;20 ;29 ;46)                                   |            | 28,3 $\pm$ 2,1                                     |
| N1 <sup>-/-</sup> ; N2 <sup>+/+</sup> ; N4 <sup>fl/fl</sup><br>#14 | So                      | 1.10 <sup>6</sup>                      | 3                             | 3 (17 ;17 ;17)                                       | p=0,005    | 72,7 $\pm$ 3,6                                     |
|                                                                    | TAM                     | 1.10 <sup>6</sup>                      | 6                             | 6 (18 ;18 ;20 ;20 ;21 ;21)                           |            | 62,2 $\pm$ 12,0                                    |
|                                                                    | So                      | 1.10 <sup>4</sup>                      | 3                             | 3 (20 ;20 ;20)                                       | p=0,005    | 61,2 $\pm$ 6,4                                     |
|                                                                    | TAM                     | 1.10 <sup>4</sup>                      | 6                             | 6 (26 ;26 ;26 ;27 ;28 ;31)                           |            | 61,4 $\pm$ 10,4                                    |
|                                                                    | So                      | 1.10 <sup>3</sup>                      | 3                             | 3 (21 ;21 ;21)                                       | p=0,05     | 66,2 $\pm$ 3,4                                     |
|                                                                    | TAM                     | 1.10 <sup>3</sup>                      | 6                             | 5 (27 ;27 ;35 ;38 ;38)                               |            | 51,8 $\pm$ 0,8                                     |
|                                                                    | So                      | 1.10 <sup>2</sup>                      | 3                             | 1 (28)                                               | ns         | 70,7                                               |
|                                                                    | TAM                     | 1.10 <sup>2</sup>                      | 6                             | 1 (60)                                               |            | 8,2                                                |

224 **Table 2.** Comparison of the leukemia initiating potential of *Nfat*-floxed and *Nfat*-defloxed versions of T-ALL #68  
 225 and T-ALL #14, generated as described in Figure 4A.

226 **NFAT factors act downstream of Cn.**

227 Our results show that NFAT deficiency essentially phenocopies Cn deficiency in T-ALL <sup>8</sup>,  
228 suggesting NFAT to be central effectors of Cn in T cell leukemogenesis. To investigate this  
229 hypothesis, we analyzed whether expression of constitutively active NFAT mutants could  
230 compensate the cellular phenotypes linked to Cn inactivation. We used the constitutive  
231 mutant NFAT1[2+5+8] <sup>21</sup> (named NFAT1\* thereafter) in which most serine residues  
232 targeted by NFAT kinases in the SRR1, SP2 and SP3 motifs were mutated into alanine, thus  
233 mimicking calcineurin-induced dephosphorylation and the same mutant carrying in  
234 addition a SV40 nuclear localization signal (NLS) motif at its C-terminus (NFAT1\*-NLS),  
235 further enhancing its nuclear accumulation and transcriptional activity <sup>21</sup>. ICN1; RC<sup>T2</sup>;  
236 CnB1<sup>fl/fl</sup> T-ALL cells <sup>8</sup>, were retrovirally transduced at the same m.o.i. either with the GFP  
237 control vector (MIG), or MIG vectors encoding HA-tagged version of either CnB1, or with  
238 the constitutive NFAT1 mutants and concomitantly treated with 4OHT to induce *CnB1*  
239 (*PPP3R1*) gene deletion and calcineurin inactivation <sup>8</sup> (Figure 5A for a schematic  
240 representation of the experiment). Leukemic cells were then co-cultured with MS5  
241 stromal cells and followed over time. As shown in Figure 5B and as previously reported,  
242 4-OHT treatment induced efficient *CnB1* gene deletion (Figure 5B) and resulted in a strong  
243 arrest in T-ALL expansion (Figure 5C), with the few cells found under these co-culture  
244 conditions resulting from the survival of a minor population of cells that escaped full *CnB1*  
245 gene deletion, detectable by PCR (Figure 5D, MIG lanes). As expected, expression of  
246 exogenous CnB1 restored the ability of T-ALL cells to survive and proliferate (Figure 5C,  
247 left panel, blue tracing) concomitant with the rapid amplification of GFP+ cells (Figure 5C,  
248 right panel, blue tracing), that retain the parental CnB<sup>del/del</sup> genotype (Figure 5D).  
249 Interestingly, both NFAT1\* and NFAT1\*-NLS rescued the survival/proliferation defect of  
250 CnB1-deficient T-ALL cells (Figure 5C red and orange tracing, respectively) albeit less

251 efficiently as compared to exogenous CnB1. Cn-deficient T-ALL cells transduced with  
 252 either of the NFAT1\* vectors (GFP+) maintained the original CnB1-deleted genotype  
 253 unlike the remaining fraction of non-transduced cells (GFP-) found in these cultures  
 254 (Figure 5D). We conclude from these experiments that constitutive NFAT activity can  
 255 restore the survival/proliferative properties of Cn-deficient T-ALL cells, indicating that  
 256 NFAT are major downstream effectors of Cn in T-ALL.

Figure 5

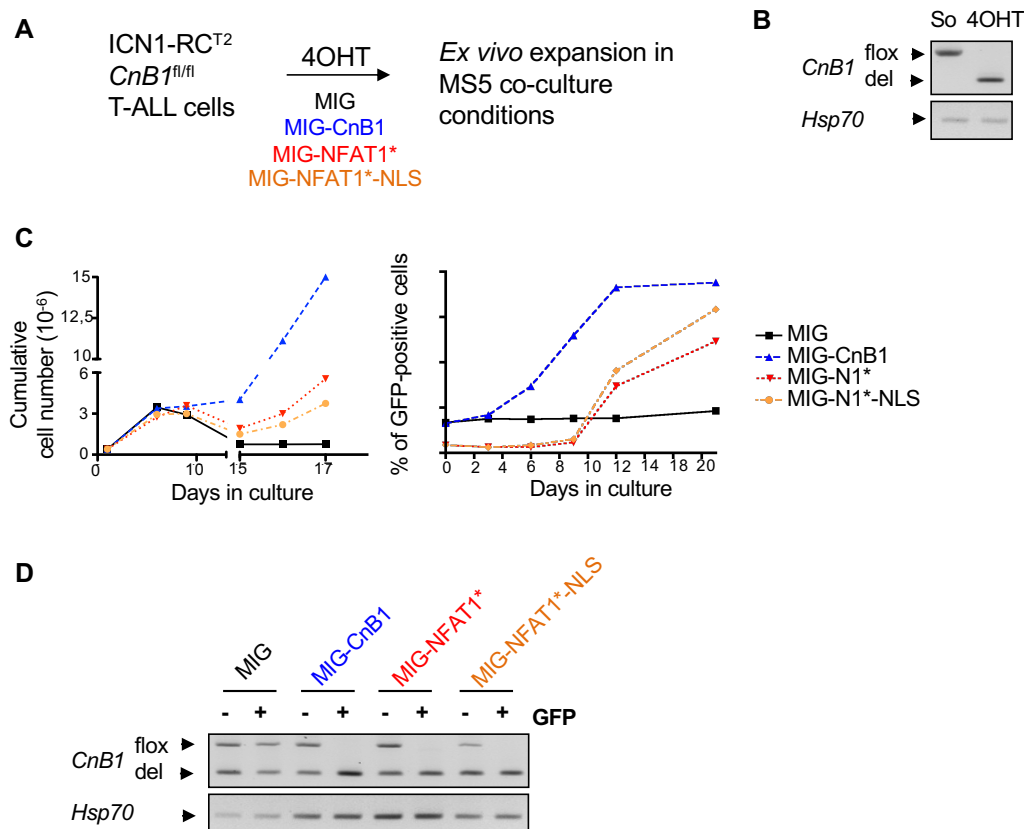

257

258

259 **Figure 5. NFAT factors are major downstream effectors of calcineurin in T-ALL.** (A) Schematic of the  
 260 experiment: leukemic cells obtained from an ICN1-induced T-ALL carrying 2 floxed alleles of *CnB1* (T-ALL #3)  
 261 were retrovirally transduced with MIG vectors encoding either HA-tagged CnB1, or HA-tagged NFAT1\*, or HA-  
 262 tagged NFAT1\*-NLS, or the control vector without insert (MIG), co-cultured on MS5 stromal cells and  
 263 immediately treated with 4OHT to delete *CnB1* floxed alleles. (B) PCR genotyping analysis for the floxed and  
 264 deleted alleles of *CnB1* in cultured cells 2 days after 4OHT treatment. PCR for *Hsp70* is used as control. (C)  
 265 Left panel: Expansion of CnB1-deleted leukemic cells transduced with MIG (black squares), MIG-CnB1 (blue



266 triangle), MIG-NFAT1\* (red triangles), MIG-NFAT1\*-NLS (orange); expansion over time is reported as the  
267 cumulative cell numbers over 17 days in MS5 co-cultures. Right panel: in the same co-cultures, enrichment in  
268 GFP+, transduced cells, was followed over time. This experiment is representative of three independent  
269 experiments. (D) PCR genotyping analysis for the floxed and deleted alleles of *CnB1* in the GFP+ (transduced)  
270 and GFP- (non-transduced) fractions of flow-cytometry sorted leukemic cells from the respective co-cultures at  
271 day 17. PCR for *Hsp70* is used as control.

272

### 273 **NFAT-dependent transcriptome in T-ALL**

274 To gain insight into the molecular basis of NFAT oncogenic properties, we compared the  
275 transcriptome of *Nfat*-proficient and *Nfat*-deficient leukemic cells, obtained as described  
276 in Figure 1A, using 3 independent ICN; RCT<sup>2</sup>; *Nfat1*<sup>-/-</sup>; *Nfat2*<sup>fl/fl</sup>; *Nfat4*<sup>fl/fl</sup> T-ALL.  
277 Hierarchical clustering analysis clearly distinguished NFAT-proficient from NFAT-  
278 deficient cells (Figure 6A) with 343 probe sets being significantly deregulated (FC>1,5  
279 and p<0,05, Supplementary Table 2). IPA analysis of this signature did not highlight  
280 deregulation of a specific pathway (data not shown). However, we noticed the up-  
281 regulation of a number of genes encoding proteins that are either physiological regulators  
282 in T cells, e.g. B- and T-cell attenuator (*Btla*), an inhibitory receptor of T cell signaling  
283 belonging to the CD28 superfamily; *Gimap7*, a member of the immunity associated  
284 GTPases, regulators of lymphocyte survival and homeostasis; *Nr4a1*, a nuclear protein  
285 involved in thymocyte clonal deletion during negative selection; *Irf4*, a transcriptional  
286 regulator involved in multiple aspects of T cell development. *Nfat* inactivation also  
287 deregulated genes implicated in cell cycle regulation (e.g. up-regulation of *Cdkn1A*,  
288 *Gadd45b*; down-regulation of *Evi5*) (Supplementary Table 2). Of note, comparison of the  
289 NFAT-regulated transcriptome with that regulated by calcineurin in ICN1 T-ALL <sup>8</sup>  
290 identified 96 commonly deregulated probe sets (Supplementary Table 3). Gene  
291 enrichment analysis revealed a robust overlap between the Calcineurin and *Nfat*-

292 dependent transcriptome, particularly amongst the upregulated processes (Figure 6B;  
293 Supplementary Table 3). We identified a node of particular interest, accounting for  
294 proteins implicated in the regulation of cell proliferation and survival (Figure 6C). RT-PCR  
295 experiments performed in independent T-ALL confirmed that both *Cdkn1a* and *Nr4a1*  
296 were up-regulated in response to either NFAT or CnB-1 inactivation (Figure 6D),  
297 validating at the molecular level the resemblance of CnB1 and NFAT loss of function  
298 phenotypes.

299         To gain insight into the functional relevance of this deregulated node, we next  
300 investigated the consequences of CDKN1a overexpression on T-ALL expansion. For this,  
301 leukemic cells were retrovirally-transduced with the MIG control vector or MIG vector  
302 encoding p21<sup>CDKN1a</sup>. Western blot analysis confirmed p21<sup>CDKN1a</sup> overexpression as  
303 compared to MIG-transduced cells (Supplementary Figure 4). Enforced expression of  
304 p21<sup>CDKN1a</sup> resulted in induction of apoptosis and impaired leukemic cell expansion in MS5  
305 co-cultures (Figure 6E and F), with transduced cells (GFP+) rapidly being counter-  
306 selected (Figure 6G). Similar results were obtained upon enforced expression of *Nr4a1*  
307 while enforced expression of *Gadd45b* was without effect (data not shown). Taken  
308 together, these results indicate an essential role of NFAT-regulated genes in orchestrating  
309 important leukemic phenotypes in T-ALL.

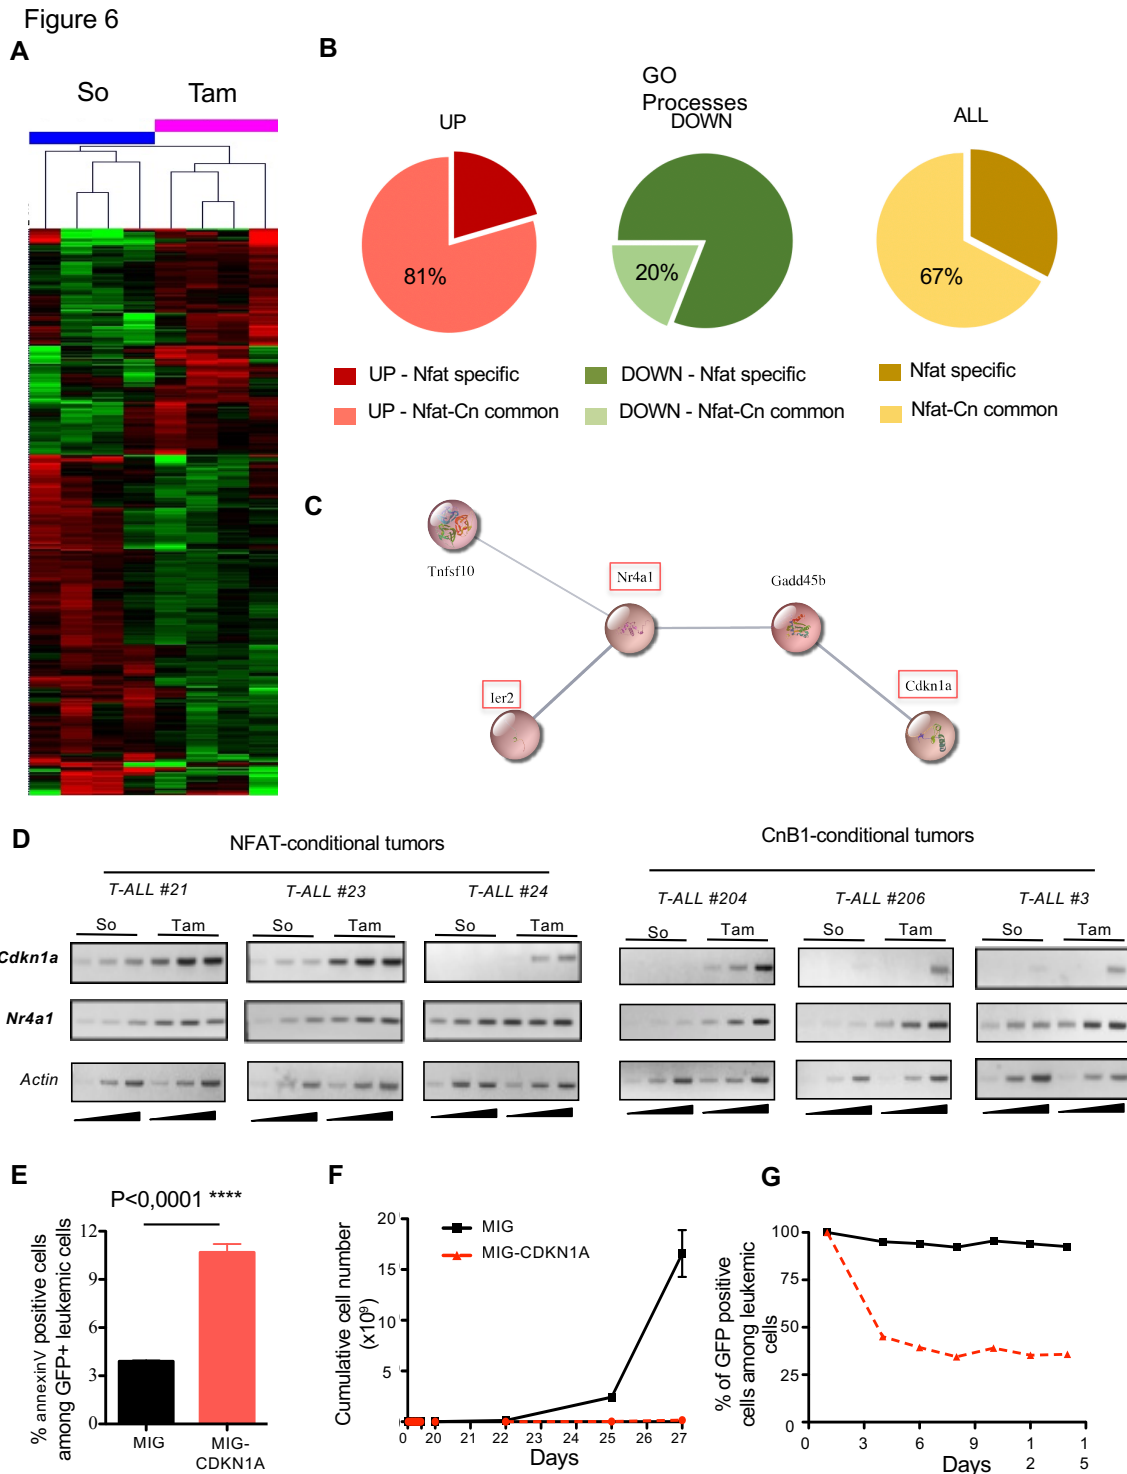

310  
311

**Figure 6. NFAT-dependent transcriptome analysis in ICN1-induced T-ALL.** (A) Global gene expression analyses of *Nfat*-proficient and *Nfat*-deficient leukemic cells obtained from T-ALL #21, #24, #23 (2 independent experiments) and sorted by flow cytometry from solvent (So)- or Tam-treated mice generated as described in Fig2A. Hierarchical clustering of the different leukemias (top legends) in their *Nfat*-competent (So) and *Nfat*-deficient (Tam) versions was performed using a fold change  $\geq 0,9$  with a p value  $< 0,05$ . The heatmap representation highlights up-regulated genes in red and down-regulated genes in green. (B) Pie charts showing the percentages

317 of commonly deregulated GO processes in the Cn-dependent and *Nfat*-dependent transcriptome. **(C)** Predicted  
318 protein interaction map retrieved from the analysis of significantly upregulated genes in the T-ALL *Nfat*-dependent  
319 transcriptome. Orange boxes point to genes commonly deregulated in both NFAT- and Cn-dependent  
320 transcriptomes **(D)** *Nfat*-proficient, *Nfat*-deficient, *CnB1*-proficient and *CnB1*-deficient versions of the indicated  
321 T-ALL were sorted by flow cytometry and analyzed by semi-quantitative RT-PCR for the expression of *Cdkn1a*  
322 and *Nr4a1*. RT-PCR for expression of  $\beta$ -*actin* is used as control **(E)** Leukemic cells from T-ALL #3 were  
323 transduced with MIG vectors encoding CDKN1A or the control MIG vector without insert. Leukemic cells  
324 survival was analyzed by Annexin V staining at day 4 in co-cultures of the indicated leukemic cells with MS5  
325 stromal cell (data are represented as  $\pm$  SEM ; n=3 ; Student's t-test). **(F)** Expansion over time in MS5 co-cultures  
326 of leukemic cells transduced with the MIG and MIG-CDKN1A vectors described in E. **(G)** Percentage of  
327 transduced (GFP+) leukemic cells in co-cultures described in (F) was followed by flow cytometry.  
328

## 329 DISCUSSION

330 We previously demonstrated through pharmacological and genetic approaches that  
331 calcineurin is important to T-ALL maintenance *in vivo* and *ex vivo* and critical to their leukemia  
332 propagating potential<sup>7,8</sup>. We now demonstrate that the three NFAT factors activated in T-ALL,  
333 namely NFAT1, 2 and 4 are also essential to the survival/proliferation/migration properties and  
334 leukemia propagating potential of T-ALL. We found that only the concomitant inactivation of  
335 all three NFAT factors results in impaired LIC activity in T-ALL, as evidenced by the fact that  
336 expression of either NFAT2 alone or NFAT4 alone was sufficient to maintain this activity. This  
337 demonstrates clear functional redundancy for these factors in T-ALL. Since expression of a  
338 constitutive mutant of NFAT1 that mimics NFAT1 dephosphorylated, active state restores the  
339 survival and proliferation properties of calcineurin-deficient leukemic cells and LIC potential  
340 (data not shown), our results highlight the central function of NFAT downstream of calcineurin  
341 activation in T-ALL.

342 The redundant function of NFAT factors in T-ALL contrasts with previous studies  
343 interrogating of NFAT involvement in other oncogenic settings. For example, while several  
344 reports have shown that constitutively activated mutant of the  $\alpha$  isoform of NFAT2 (the so-  
345 called short NFAT2 isoform) transforms mouse 3T3L1 adipocytes and NIH3T3 fibroblasts *in*  
346 *vitro*<sup>18, 22, 23</sup>, a constitutively activated phosphorylation mutant of NFAT1 (named NFAT1\*  
347 NLS in the present study) was unable to recapitulate those effects, and even inhibited cell  
348 transformation by constitutively active NFAT2 or the Ha-RAS oncoprotein<sup>23</sup>. Likewise,  
349 NFAT1 *ex vivo* studies have suggested that NFAT1 has a non-redundant function in the invasive  
350 properties of breast carcinoma cell lines<sup>24</sup> while, in mice, the tumorigenic/metastatic potential  
351 of mammary tumor cells rather depends upon non redundant functions of NFAT1 and NFAT2  
352<sup>25</sup>. At the molecular level, NFAT2, but not NFAT1, is recruited to the *c-MYC* gene promoter

353 leading to c-MYC over-expression, which is required for tumor maintenance together with the  
354 deregulation of other survival genes in aggressive B cell lymphomas <sup>26</sup>.  
355 The *Nfat1* gene has been shown to restrain the proliferation of naive T cells *in vivo* <sup>27, 28</sup> and to  
356 exert tumor suppressive functions in the mouse B cell lineage <sup>29</sup>. Our data show that loss of  
357 NFAT1 function does not affect leukemia onset and outcome in T-ALL induced in mice by  
358 activated NOTCH1 (ICN1) or activated JAK2 (TEL/ETV6-JAK2), indicating lack of tumor  
359 suppressive function of *Nfat1* in early T cell progenitors. We found that although expression of  
360 the constitutive mutant NFAT1\*-NLS rescues survival/proliferation of CnB1-deficient T-ALL  
361 cells, it is deleterious to the survival/proliferation of CnB1-proficient ICN1 T-ALL cells *ex vivo*  
362 and *in vivo* (data not shown). This indicates that NFAT activity must be finely regulated to  
363 sustain its pro-leukemic activity in T-ALL. In line with this, fine-tuned regulation of NFAT  
364 activity is also recognized as being essential under physiological conditions for instance during  
365 thymocytes development <sup>30</sup>.

366         Comparison of the NFAT-dependent transcriptome with that associated with calcineurin  
367 inactivation in ICN1-induced T-ALL<sup>8</sup> identifies a common signature, with 67% of NFAT  
368 regulated genes being also Cn-regulated. This Cn/NFAT signature in T-ALL differs from the  
369 NFAT-dependent signature characteristic of the TCR-dependent activation of peripheral T cells  
370 as no difference in expression in e.g. the genes encoding IL2, IL3, IL4, IL5, IL13, IFN $\gamma$ , GM-  
371 CSF was found upon *CnB1* or *Nfat* deletion in T-ALL cells. Besides T cell differentiation and  
372 activation, NFAT is also involved in exhaustion of activated T cells to limit or constrain the  
373 immune response <sup>16, 31</sup>. Although a trend was observed for inhibition of the expression of *Pdcd1*,  
374 *Lag-3* and *Ctla4* (genes encoding receptors involved in NFAT-mediated exhaustion) in *Nfat*-  
375 deficient T-ALL, their differential expression in our global transcriptomic analyses did not  
376 reach statistical significance.

377 Instead we found NFAT to impact T-ALL maintenance through deregulation of genes with  
378 demonstrated inhibitory properties on survival, cell cycle progression of normal T cell  
379 progenitors. *Cdkn1a*, a gene recurrently altered in T-ALL diagnostic samples through promoter  
380 methylation <sup>32</sup> and *Nr4a1*, a gene involved in clonal deletion of self-reactive T cells during  
381 thymic negative selection and in activated T cell exhaustion <sup>33, 34</sup> are up-regulated upon either  
382 *CnB1* or *Nfat* inactivation and contribute to ICN1 T-ALL maintenance. Available evidence  
383 indicates that these genes can be regulated by NFAT factors independently of their binding to  
384 specific DNA sequences but rather through protein-protein interactions with other transcription  
385 factors <sup>35, 36</sup>. We also found Cn/NFAT-dependent expression of *Tox* in ICN1-induced T-ALL.  
386 *Tox* encodes a protein that facilitates genomic instability in T-ALL and essential for T-ALL cell  
387 lines survival/ proliferation and for *in vivo* maintenance <sup>37</sup>. Because constitutive expression of  
388 CDKN1a (this study), NR4A1 (data not shown) or TOX knockdown <sup>37</sup> are sufficient to partially  
389 mimic the deleterious phenotypes induced upon NFAT or calcineurin deletion, this suggests  
390 that the Cn and NFAT commonly deregulated genes are central mediators of the pro-oncogenic  
391 properties of Cn/NFAT pathway.

392 Besides these transcriptionally regulated candidates, we also identified CXCR4 cell  
393 surface expression being commonly modulated by Cn and NFAT. Since NFAT-deficient cells  
394 also present reduced CXCR4 cell surface expression level (data not shown), this defect could  
395 explain the migration defect and impaired leukemia inducing potential as demonstrated for Cn-  
396 deficient leukemic cells <sup>6</sup>, reinforcing a major role for Cn/NFAT axis in T-ALL.

397 Not surprisingly, we found the number of genes regulated by calcineurin <sup>8</sup> to be broader  
398 than that dependent upon NFAT (this study), indicating that in addition to NFAT, calcineurin  
399 likely acts through other effectors to enforce leukemia inducing potential in T-ALL. In line with  
400 this hypothesis, several new Cn interacting proteins were recently identified, the inactivation of  
401 which could synergize with Cn inhibition to impair T-ALL expansion <sup>38, 39</sup>. We also noticed a

402 number of genes specifically deregulated upon *Nfat* deletion, but not upon *CnB1* deletion,  
403 indicating that NFAT activity can be critically regulated by upstream signaling pathways in  
404 addition to their Cn-mediated nuclear translocation. In normal early T cell progenitors, the  
405 IL7/IL7R/JAK3 signaling pathway directly regulates NFAT2 through phosphorylation on a  
406 tyrosine residue in its regulatory domain <sup>11</sup>. Moreover, NFAT2 activity was also identified as a  
407 target of PIM kinases independent of calcineurin activation <sup>40</sup>. High PIM1 expression is a  
408 biomarker in T-ALL cases with JAK/STAT activation and response of leukemic cells to  
409 endogenous IL7 <sup>41, 42</sup>, with PIM targeting cooperating with chemotherapy to promote leukemic  
410 mice survival in T-ALL PDXs <sup>42</sup>. Nevertheless, we did not find NFAT activity to be modulated  
411 by IL7 in T-ALL cells (data not shown), leaving space to speculate on new NFAT regulators in  
412 this context.

413 While T-ALL is a highly heterogeneous disease, patient treatment relies mostly on  
414 general chemotherapeutic regimens with 20% and 50% of pediatric and adult cases relapsing  
415 respectively. Targeted therapies are thus awaited for this pathology. Targeting calcineurin using  
416 CsA or FK506 could be a therapeutical option in T-ALL, yet these drugs are associated with  
417 induction of secondary cancer <sup>43</sup> and ill-characterized off-target effects that limit their  
418 usefulness. The identification of downstream effectors of calcineurin as reported here may thus  
419 open novel pre-clinical investigations paths. Inhibitors of NFAT have been developed (INCA1,  
420 2 and 6, JapA, MA242, compound 10), that act by preventing Cn/NFAT interaction <sup>44</sup>,  
421 promoting NFAT degradation <sup>45</sup> or interfering with NFAT binding partners <sup>46</sup>. Given the  
422 essential role of NFAT in T-ALL, it would be interesting to analyze in the future whether these  
423 compounds represent valid therapeutic alternatives to overcome treatment limitations in T-  
424 ALL.

425

426



## 427 **MATERIELS AND METHODS**

428 *Analysis of T-all mouse models.* Mice carrying null (-) alleles of *Nfat1*<sup>27</sup>, the floxed (flox) and  
429 deleted (del) alleles of *Nfat2* (a generous gift of Dr. A. Rao) and *Nfat4*<sup>12</sup> (a generous gift of Dr.  
430 GR Crabtree) and the Rosa-Cre-ER<sup>T2</sup> (RC<sup>T2</sup>) transgene<sup>47</sup> were maintained on a C57BL/6  
431 genetic background. Mice were crossed to generate the following compound mice: RC<sup>T2</sup>; *Nfat1*<sup>-/-</sup>;  
432 *Nfat2*<sup>flox/del</sup>; *Nfat4*<sup>flox/flox</sup>, or RC<sup>T2</sup>; *Nfat1*<sup>-/-</sup>; *Nfat2*<sup>flox/flox</sup>; *Nfat4*<sup>+/+</sup>, or RC<sup>T2</sup>-*Nfat1*<sup>-/-</sup>; *Nfat2*<sup>+/+</sup>;  
433 *Nfat4*<sup>flox/flox</sup>. Primary ICN1 (intracellular NOTCH1 domain)-induced T-ALL were obtained  
434 following retroviral-mediated gene transfer of bone marrow (BM) cells from the respective  
435 mice using either MIN-ICN1 or MIG-ICN1, which also encode either a truncated human NGFR  
436 from an IRES-tNGFR cassette or eGFP, respectively, as described<sup>8</sup>. T-ALL of the different  
437 genotypes emerged within 4-6 weeks and leukemic cells (tNGFR<sup>+</sup> or GFP<sup>+</sup>) were collected from  
438 BM for further studies. To study *Nfat* function in T-ALL, leukemic cells of the indicated  
439 genotypes were intravenously (i.v) infused into secondary wild-type mice, conditions that result  
440 in synchronous leukemia engraftment in recipients. Engraftment was followed by sacrificing  
441 mice at regular time intervals and measuring % of tNGFR<sup>+</sup> (GFP<sup>+</sup>) leukemic cells in BM. Cre  
442 activation was induced in leukemic cells by Tamoxifen (Tam) administration (Sigma-Aldrich;  
443 1mg/mouse, three times at 24 hours intervals). Carrier solvent (corn oil, So) was used as control.  
444 Unless otherwise stated, Tam administration was started when leukemic burden reached 10-  
445 15% T-ALL cells in BM (usually 10-14 days after leukemic cells infusion). In these conditions,  
446 Cre-mediated loss of NFATs activity is experienced by leukemic cells 2 days later<sup>8</sup>. Mice were  
447 sacrificed when becoming moribund (5 days after the start of treatment). To study NFAT factors  
448 function in T-ALL leukemia initiating potential, NFAT-proficient and NFAT-deficient  
449 leukemic cells obtained from carrier solvent or Tam-treated mice were injected i.v at different  
450 doses (from 10<sup>6</sup> to 10<sup>3</sup> leukemic cells/mouse) into wild-type, syngeneic recipient mice. Time to  
451 death and leukemia burden, as analyzed by flow cytometry as % FSC large/tNGFR<sup>+</sup> (or GFP<sup>+</sup>)

452 leukemic blasts in BM, spleen and liver, were recorded. Mice were maintained under specific  
453 pathogen-free conditions in the animal facility of the Institut Curie. Experiments were carried  
454 out in accordance with the European Union and French National Committee recommendations,  
455 under agreement APAFIS #7393-2016102810475144-v1

456  
457 Microarray analysis. Total RNA was isolated from flow-cytometry-sorted leukemic cells  
458 (tNGFR+) 5 days following treatment with either tamoxifen or carrier solvent, using the Rneasy  
459 kit (QIAGEN). cRNA synthesis and hybridization of Mouse GeneChip® 430 2.0 arrays  
460 (Affymetrix) were according to the manufacturer's instructions, as described ([http://www-](http://www-microarrays.u-strasbg.fr)  
461 [microarrays.u-strasbg.fr](http://www-microarrays.u-strasbg.fr)). A paired Student's t-test was performed to compare gene intensities  
462 in the different biological replicates. Genes were considered significantly regulated when fold-  
463 change was  $\geq 1.9$  and  $p\ value \leq 0.05$ . Significantly deregulated genes from our dataset (NFAT)  
464 and from (Cn)<sup>8</sup> were used to perform pathways and processes enrichment analysis via the  
465 online STRING platform. The percentage of shared significantly upregulated, down regulated  
466 and overall deregulated processes are shown. Using a spring model via the STRING platform,  
467 we generated a network of predicted associated upregulated proteins.

468  
469 Flow cytometry, apoptosis, proliferation and migration analyses. Surface staining of tNGFR  
470 leukemic cells was performed with PE-conjugated anti-human CD271 antibody (BD  
471 Biosciences). Apoptosis assays were carried out as described<sup>8</sup>, using PE-conjugated-anti-active  
472 Caspase-3 antibody (BD Biosciences). BrdU incorporation assays were performed as described  
473<sup>6</sup>, using APC-conjugated anti-BrdU antibody (BD Biosciences). Flow cytometry acquisitions  
474 were carried out on a FACSCalibur™ analyzer (BD Biosciences) equipped to detect 4  
475 fluorescent parameters with the assistance of BD CellQuest Software (BD Biosciences) and  
476 data were analyzed with FlowJo Software (Tree Star). ICN1 leukemic cells were sorted on a

477 FACS Aria™III (BD Biosciences) cell sorter on the basis of tNGFR and/or GFP expression with  
478 the assistance of BD FACSDiva Software (BD Biosciences). Migration analyses were  
479 performed by videomicroscopy, as described <sup>6</sup>.

480

481 Statistics. Statistical analyses were performed with GraphPad Prism (version 6.0; GraphPad  
482 Software, Inc.). The data are expressed as mean ± standard deviation (s.d) of n = 3 or more  
483 determinations. Unpaired two-tailed Student's *t* tests were used to analyze experimental data  
484 between two groups. For three or more groups, a one-way ANOVA was performed using  
485 Tukey's test. Overall survival of mice infused with ICN1-induced T-ALL was calculated  
486 according to the Kaplan-Meier method. Log-rank test was used to analyze survival curves  
487 comparisons. Differences were considered statistically significant at  $p < .05$  (\*),  $p < .01$  (\*\*) or  
488  $p < .001$  (\*\*\*).

489

490

## 491 **AKNOWLEDGMENTS**

492 This work was supported by funds from Institut Curie, Centre National de la Recherche  
493 Scientifique (CNRS), Institut National de la Santé et de la Recherche Médicale (INSERM),  
494 Ligue contre le Cancer and Fondation ARC pour la recherche contre le cancer. CC, DP and SG  
495 were supported by pre-doctoral fellowships from the University Paris-Diderot and Ligue  
496 Nationale Contre le Cancer. The authors thank E Belloir, C Alberti and C Roulle (Institut Curie  
497 animal facility) for expert technical assistance.

498

## 499 **COMPETING INTERESTS**

500 CTQ and JG have research agreements with Servier and Autolus Ltd. The remaining authors  
501 declare no competing financial interests.

502

503

## 504 **REFERENCES**

- 505 1. Girardi, T., Vicente, C., Cools, J. & De Keersmaecker, K. The genetics and molecular  
506 biology of T-ALL. *Blood* **129**, 1113–1123 (2017).
- 507 2. Weng, A. P. *et al.* Activating Mutations of NOTCH1 in Human T Cell Acute Lymphoblastic  
508 Leukemia. *Science* **306**, 269–271 (2004).
- 509 3. Chiang, M. Y. *et al.* Leukemia-associated *NOTCH1* alleles are weak tumor initiators but  
510 accelerate K-ras–initiated leukemia. *J. Clin. Invest.* **118**, 3181–3194 (2008).
- 511 4. Passaro, D., Quang, C. T. & Ghysdael, J. Microenvironmental cues for T-cell acute  
512 lymphoblastic leukemia development. *Immunol. Rev.* **271**, 156–172 (2016).
- 513 5. Pitt, L. A. *et al.* CXCL12-Producing Vascular Endothelial Niches Control Acute T Cell  
514 Leukemia Maintenance. *Cancer Cell* **27**, 755–768 (2015).

- 515 6. Passaro, D. *et al.* CXCR4 Is Required for Leukemia-Initiating Cell Activity in T Cell Acute  
516 Lymphoblastic Leukemia. *Cancer Cell* **27**, 769–779 (2015).
- 517 7. Medyouf, H. *et al.* Targeting calcineurin activation as a therapeutic strategy for T-cell acute  
518 lymphoblastic leukemia. *Nat. Med.* **13**, 736–741 (2007).
- 519 8. Gachet, S. *et al.* Leukemia-initiating cell activity requires calcineurin in T-cell acute  
520 lymphoblastic leukemia. *Leukemia* **27**, 2289–2300 (2013).
- 521 9. Müller, M. R. & Rao, A. NFAT, immunity and cancer: a transcription factor comes of age.  
522 *Nat. Rev. Immunol.* **10**, 645–656 (2010).
- 523 10. Sharma, S. *et al.* Dephosphorylation of the nuclear factor of activated T cells (NFAT)  
524 transcription factor is regulated by an RNA-protein scaffold complex. *Proc. Natl. Acad. Sci.*  
525 **108**, 11381–11386 (2011).
- 526 11. Patra, A. K. *et al.* An alternative NFAT-activation pathway mediated by IL-7 is critical  
527 for early thymocyte development. *Nat. Immunol.* **14**, 127–135 (2013).
- 528 12. Canté-Barrett, K., Winslow, M. M. & Crabtree, G. R. Selective Role of NFATc3 in  
529 Positive Selection of Thymocytes. *J. Immunol.* **179**, 103–110 (2007).
- 530 13. Oukka, M. *et al.* The Transcription Factor NFAT4 Is Involved in the Generation and  
531 Survival of T Cells. *Immunity* **9**, 295–304 (1998).
- 532 14. Peng, S. L., Gerth, A. J., Ranger, A. M. & Glimcher, L. H. NFATc1 and NFATc2  
533 Together Control Both T and B Cell Activation and Differentiation. *Immunity* **14**, 13–20  
534 (2001).
- 535 15. Ranger, A. M., Oukka, M., Rengarajan, J. & Glimcher, L. H. Inhibitory Function of  
536 Two NFAT Family Members in Lymphoid Homeostasis and Th2 Development. *Immunity*  
537 **9**, 627–635 (1998).
- 538 16. Martinez, G. J. *et al.* The Transcription Factor NFAT Promotes Exhaustion of Activated  
539 CD8<sup>+</sup> T Cells. *Immunity* **42**, 265–278 (2015).

- 540 17. Yissachar, N. *et al.* Dynamic Response Diversity of NFAT Isoforms in Individual  
541 Living Cells. *Mol. Cell* **49**, 322–330 (2013).
- 542 18. Mognol, G. P., Carneiro, F. R. G., Robbs, B. K., Faget, D. V. & Viola, J. P. B. Cell cycle  
543 and apoptosis regulation by NFAT transcription factors: new roles for an old player. *Cell*  
544 *Death Dis.* **7**, e2199–e2199 (2016).
- 545 19. Carron, C. *et al.* TEL-JAK2 transgenic mice develop T-cell leukemia. *Blood* **95**, 3891–  
546 3899 (2000).
- 547 20. dos Santos, N. R. *et al.* Pre-TCR expression cooperates with TEL-JAK2 to transform  
548 immature thymocytes and induce T-cell leukemia. *Blood* **109**, 3972–3981 (2007).
- 549 21. Okamura, H. *et al.* Concerted Dephosphorylation of the Transcription Factor NFAT1  
550 Induces a Conformational Switch that Regulates Transcriptional Activity. *Mol. Cell* **6**, 539–  
551 550 (2000).
- 552 22. Neal, J. W. & Clipstone, N. A. A Constitutively Active NFATc1 Mutant Induces a  
553 Transformed Phenotype in 3T3-L1 Fibroblasts. *J. Biol. Chem.* **278**, 17246–17254 (2003).
- 554 23. Robbs, B. K., Cruz, A. L. S., Werneck, M. B. F., Mognol, G. P. & Viola, J. P. B. Dual  
555 Roles for NFAT Transcription Factor Genes as Oncogenes and Tumor Suppressors. *Mol.*  
556 *Cell. Biol.* **28**, 7168–7181 (2008).
- 557 24. Jauliac, S. *et al.* The role of NFAT transcription factors in integrin-mediated carcinoma  
558 invasion. *Nat. Cell Biol.* **4**, 540–544 (2002).
- 559 25. Tran Quang, C. *et al.* The calcineurin/NFAT pathway is activated in diagnostic breast  
560 cancer cases and is essential to survival and metastasis of mammary cancer cells. *Cell Death*  
561 *Dis.* **6**, e1658–e1658 (2015).
- 562 26. Pham, L. V., Tamayo, A. T., Li, C., Bueso-Ramos, C. & Ford, R. J. An epigenetic  
563 chromatin remodeling role for NFATc1 in transcriptional regulation of growth and survival  
564 genes in diffuse large B-cell lymphomas. *Blood* **116**, 3899–3906 (2010).

- 565 27. Xanthoudakis, S. *et al.* An Enhanced Immune Response in Mice Lacking the  
566 Transcription Factor NFAT1. *Science* **272**, 892–895 (1996).
- 567 28. Hodge, M. R. *et al.* Hyperproliferation and Dysregulation of IL-4 Expression in NF-  
568 ATp-Deficient Mice. *Immunity* **4**, 397–405 (1996).
- 569 29. May, S. L. *et al.* Nfatc2 and Tob1 Have Non-Overlapping Function in T Cell Negative  
570 Regulation and Tumorigenesis. *PLOS ONE* **9**, e100629 (2014).
- 571 30. Klein-Hessling, S. *et al.* A threshold level of NFATc1 activity facilitates thymocyte  
572 differentiation and opposes notch-driven leukaemia development. *Nat. Commun.* **7**, 11841  
573 (2016).
- 574 31. Chen, J. *et al.* NR4A transcription factors limit CAR T cell function in solid tumours.  
575 *Nature* **567**, 530–534 (2019).
- 576 32. Davies, C. *et al.* p53-independent Epigenetic Repression of the p21WAF1 Gene in T-  
577 cell Acute Lymphoblastic Leukemia. *J. Biol. Chem.* **286**, 37639–37650 (2011).
- 578 33. Cainan, B. J., Szychowski, S., Ka-Ming Chan, F., Cado, D. & Winoto, A. A role for the  
579 orphan steroid receptor Nur77 in apoptosis accompanying antigen-induced negative  
580 selection. *Immunity* **3**, 273–282 (1995).
- 581 34. Seo, H. *et al.* TOX and TOX2 transcription factors cooperate with NR4A transcription  
582 factors to impose CD8<sup>+</sup> T cell exhaustion. *Proc. Natl. Acad. Sci.* **116**, 12410–12415 (2019).
- 583 35. Santini, M. P., Talora, C., Seki, T., Bolgan, L. & Dotto, G. P. Cross talk among  
584 calcineurin, Sp1/Sp3, and NFAT in control of p21WAF1/CIP1 expression in keratinocyte  
585 differentiation. *Proc. Natl. Acad. Sci.* **98**, 9575–9580 (2001).
- 586 36. Youn, H.-D., Chatila, T. A. & Liu, J. O. Integration of calcineurin and MEF2 signals by  
587 the coactivator p300 during T-cell apoptosis. *EMBO J.* **19**, 4323–4331 (2000).
- 588 37. Lobbardi, R. *et al.* TOX Regulates Growth, DNA Repair, and Genomic Instability in T-  
589 cell Acute Lymphoblastic Leukemia. *Cancer Discov.* **7**, 1336–1353 (2017).

- 590 38. Tosello, V. *et al.* Calcineurin complex isolated from T-cell acute lymphoblastic  
591 leukemia (T-ALL) cells identifies new signaling pathways including mTOR/AKT/S6K  
592 whose inhibition synergize with calcineurin inhibition to promote T-ALL cell death.  
593 *Oncotarget* **7**, 45715–45729 (2016).
- 594 39. Wigington, C. P. *et al.* Systematic Discovery of Short Linear Motifs Decodes  
595 Calcineurin Phosphatase Signaling. *Mol. Cell* **79**, 342-358.e12 (2020).
- 596 40. Eerola, S. K. *et al.* Phosphorylation of NFATC1 at PIM1 target sites is essential for its  
597 ability to promote prostate cancer cell migration and invasion. *Cell Commun. Signal.* **17**, 148  
598 (2019).
- 599 41. La Starza, R. *et al.* High PIM1 expression is a biomarker of T-cell acute lymphoblastic  
600 leukemia with JAK/STAT activation or t(6;7)(p21;q34)/ TRB@-PIM1 rearrangement.  
601 *Leukemia* **32**, 1807–1810 (2018).
- 602 42. De Smedt, R. *et al.* Targeting cytokine- and therapy-induced PIM1 activation in  
603 preclinical models of T-cell acute lymphoblastic leukemia and lymphoma. *Blood* **135**, 1685–  
604 1695 (2020).
- 605 43. Wimmer, C. D. *et al.* Impact of cyclosporine versus tacrolimus on the incidence of de  
606 novo malignancy following liver transplantation: a single center experience with 609  
607 patients. *Transpl. Int.* **26**, 999–1006 (2013).
- 608 44. Roehrl, M. H. A. *et al.* Selective inhibition of calcineurin-NFAT signaling by blocking  
609 protein–protein interaction with small organic molecules. *Proc. Natl. Acad. Sci.* **101**, 7554–  
610 7559 (2004).
- 611 45. Wang, W. *et al.* MDM2-NFAT1 dual inhibitor, MA242: Effective against  
612 hepatocellular carcinoma, independent of p53. *Cancer Lett.* **459**, 156–167 (2019).
- 613 46. Mognol, G. P. *et al.* Targeting the NFAT:AP-1 transcriptional complex on DNA with a  
614 small-molecule inhibitor. *Proc. Natl. Acad. Sci.* **116**, 9959–9968 (2019).



615 47. Seibler, J. *et al.* Rapid generation of inducible mouse mutants. *Nucleic Acids Res.* **31**,  
616 e12–e12 (2003).

617

618

619 **SUPPLEMENTAL FIGURES AND TABLES**

Suppl figure 1

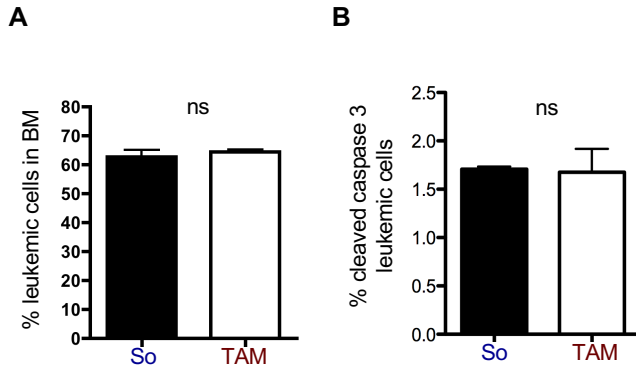

620

621 **Supplementary Figure 1. Analysis of the consequences of short-term *Nfat* inactivation in ICN1-induced T-**  
622 **ALL.** The *Nfat*-proficient and *Nfat*-deficient versions of T-ALL #21 were generated as described in Fig1A. Mice  
623 were sacrificed when terminally ill, 2 days after the end of So and Tam treatments (1 and 2 in Fig1A). **(A)**  
624 Leukemic burden (% tNGFR+ cells) in BM was analyzed by flow cytometry at the time mice were killed (data are  
625 represented as  $\pm$  SEM ; n=3 ; Student's t-test ; ns : non significant). **(B)** Apoptosis in leukemic cells described in  
626 **(A)** was analyzed by measuring caspase 3 activation by flow cytometry (data are represented as  $\pm$  SEM ; n=3 ;  
627 Student's t-test ; ns : non significant).

628

Suppl figure 2

**A**

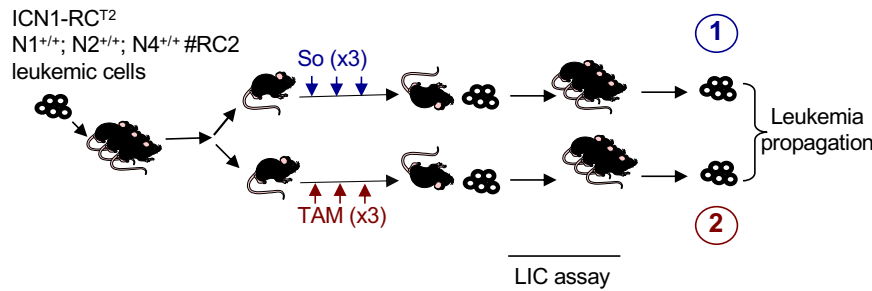

**B**

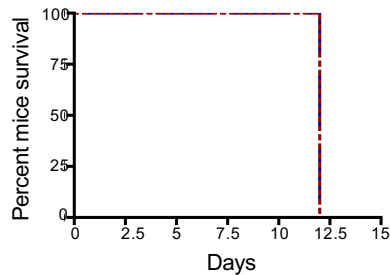

**C**

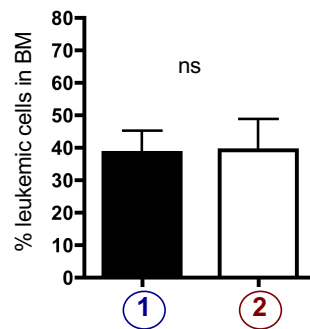

629

630 **Supplementary Figure 2. Rosa-Cre activation does not affect leukemia propagation after transplantation.**

631 **(A)** Schematic representation of the experiment: Mice were injected with leukemic cells obtained from T-ALL  
632 ICN1; RC<sup>T2</sup>; NFAT1<sup>+/+</sup>; NFAT2<sup>+/+</sup>; NFAT4<sup>+/+</sup>. When BM leukemia burden reached about 10-15% leukemic  
633 cells in recipients, mice received 3 successive daily injection of either carrier solvent (So, n=3) or tamoxifen (TAM,  
634 n=6). Terminally ill mice from both groups were sacrificed 2 days later and leukemic cells from So-treated (blue  
635 label, 1) or Tam-treated (red label, 2) cells (10<sup>6</sup> cells/mouse) were transplanted in wild-type secondary recipients  
636 that were followed for leukemia recurrence. **(B)** Kaplan-Meier survival curve of recipient mice infused with 1x10<sup>6</sup>  
637 T-ALL #RC2 cells. Mice were followed overtime for tumor recurrence and recipient mice survival. **(C)** Leukemic  
638 burden analysis of recipient mice (n=3 for each group) infused with T-ALL #RC2 cells expressing NFAT factors  
639 *Nfat*-proficient (data are represented as ± SEM; n=3; Student's t test; ns: non significant).

640

Suppl figure 3

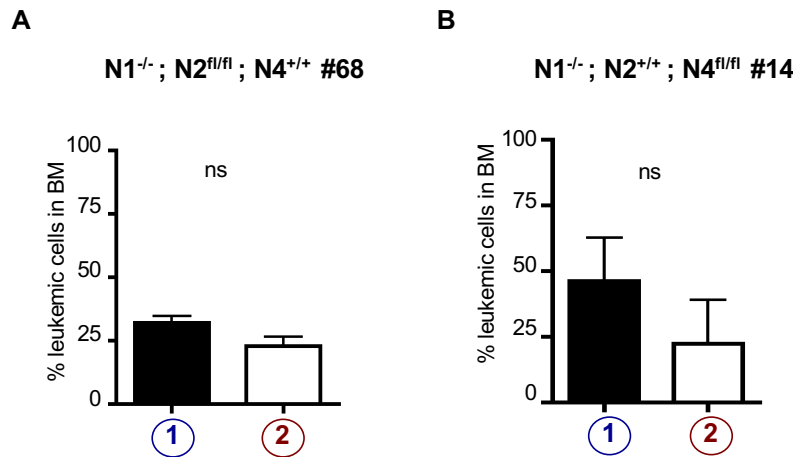

641

642 **Supplementary Figure 3. Leukemic load in mice injected with ICN1-induced T-ALL driven only by NFAT2**

643 **or NFAT4.** T-ALL #68 and #14 expressing only NFAT4 or NFAT2 respectively were generated as described in

644 Fig 4A. Mice were sacrificed when terminally ill, 2 days after the end of So and TAM treatments (1 and 2 in Fig.

645 5A) and analyzed for leukemic burden (% GFP<sup>+</sup> cells for tumor #68 in panel A; % tNGFR<sup>+</sup> cells for tumor #14

646 in panel B).

647

648

Suppl figure 4

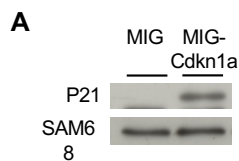

649

650 **Supplementary Figure 4.**

651 Leukemic cells from T-ALL #3 were transduced with MIG vectors encoding CDKN1A or the control MIG vector

652 without insert. Leukemic cells co-cultured on MS5 stromal cells for 2 days were analyzed by western blot for P21

653 expression. SAM68 is used as loading control.

654

655

656 **Supplementary Table 1**

657

658

| Leukemia id | Treatment of donor mice | Number of cells injected in recipients | Number of injected recipients | Number of leukemic recipients (time to death, days) | Statistics | % leukemic cells in the BM $\pm$ SEM of recipients |
|-------------|-------------------------|----------------------------------------|-------------------------------|-----------------------------------------------------|------------|----------------------------------------------------|
| #RC2        | So                      | 4.10 <sup>6</sup>                      | 3                             | 3 (14 ;16 ;16)                                      | ns         | 57,3 $\pm$ 13,3                                    |
|             | TAM                     | 4.10 <sup>6</sup>                      | 3                             | 3 (16 ;16 ;18)                                      |            | 56,2 $\pm$ 12                                      |
|             | So                      | 1.10 <sup>4</sup>                      | 3                             | 3 (21 ;21 ;24)                                      | ns         | 74,8 $\pm$ 2,2                                     |
|             | TAM                     | 1.10 <sup>4</sup>                      | 3                             | 3 (21 ;23 ;23)                                      |            | 69,78 $\pm$ 9,9                                    |
|             | So                      | 1.10 <sup>3</sup>                      | 3                             | 3 (25 ;25 ;25)                                      | ns         | 64,8 $\pm$ 13,3                                    |
|             | TAM                     | 1.10 <sup>3</sup>                      | 3                             | 3 (25 ;28 ;28)                                      |            | 79,5 $\pm$ 1,8                                     |
|             | So                      | 1.10 <sup>2</sup>                      | 3                             | 3 (30 ;32 ;36)                                      | ns         | 79,3 $\pm$ 0,8                                     |
|             | TAM                     | 1.10 <sup>2</sup>                      | 3                             | 3 (30 ;34 ;36)                                      |            | 75,6 $\pm$ 1,8                                     |

659

660

661

662 **Supplementary Table 2. NFAT-dependent transcriptome in T-ALL**

663

664

665 **Up-regulated probe sets upon NFAT inactivation**

666

667

| Gene Symbol   | Gene Name                                               | Fold-Change | P-Value  |
|---------------|---------------------------------------------------------|-------------|----------|
| Gimap4        | GTPase, IMAP family member 4                            | 4,20        | 3,71E-02 |
| Gimap4        | GTPase, IMAP family member 4                            | 4,18        | 2,60E-02 |
| Pou2af1       | POU domain, class 2, associating factor 1               | 4,10        | 3,42E-02 |
| Btla          | B and T lymphocyte associated                           | 4,07        | 2,20E-03 |
| Cd300lf       | CD300 antigen like family member F                      | 3,63        | 3,02E-02 |
| 5830411N06Rik | RIKEN cDNA 5830411N06 gene                              | 3,63        | 1,17E-03 |
| Cdyl2         | chromodomain protein, Y chromosome-like 2               | 3,38        | 1,08E-02 |
| Fam183b       | family with sequence similarity 183, member B           | 3,27        | 2,40E-02 |
| Gimap7        | GTPase, IMAP family member 7                            | 3,23        | 1,97E-02 |
| Cd163l1       | CD163 molecule-like 1                                   | 3,19        | 1,13E-02 |
| 2810459M11Rik | RIKEN cDNA 2810459M11 gene                              | 3,18        | 1,54E-03 |
| Bex6          | brain expressed gene 6                                  | 3,15        | 2,11E-02 |
| Stgal1        | beta galactoside alpha 2,6 sialyltransferase 1          | 3,06        | 3,40E-02 |
| Stc1          | stanniocalcin 1                                         | 2,88        | 1,12E-02 |
| Hemgn         | hemogen                                                 | 2,80        | 3,00E-02 |
| Cdkn1a        | cyclin-dependent kinase inhibitor 1A (P21)              | 2,74        | 1,30E-02 |
| Irf4          | interferon regulatory factor 4                          | 2,73        | 1,57E-03 |
| Cdkn1a        | cyclin-dependent kinase inhibitor 1A (P21)              | 2,73        | 4,03E-02 |
| Gjb2          | gap junction protein, beta 2                            | 2,68        | 6,48E-03 |
| Cdyl2         | Chromodomain protein, Y chromosome-like 2               | 2,66        | 2,70E-02 |
| Plac8         | placenta-specific 8                                     | 2,65        | 4,38E-02 |
| Ndr1          | N-myc downstream regulated gene 1                       | 2,64        | 2,24E-02 |
| Upb1          | ureidopropionase, beta                                  | 2,62        | 9,00E-03 |
| 2010007H06Rik | RIKEN cDNA 2010007H06 gene                              | 2,62        | 6,98E-03 |
| Ndr1          | N-myc downstream regulated gene 1                       | 2,61        | 4,65E-02 |
| Ndr1          | N-myc downstream regulated gene 1                       | 2,60        | 4,72E-02 |
| Ppm1l         | protein phosphatase 1 (formerly 2C)-like                | 2,57        | 2,09E-02 |
| Abcb1b        | ATP-binding cassette, sub-family B (MDR/TAP), member 1B | 2,54        | 3,29E-03 |
| Nr4a1         | nuclear receptor subfamily 4, group A, member 1         | 2,53        | 2,31E-02 |
| Ndr1          | N-myc downstream regulated gene 1                       | 2,48        | 2,37E-02 |
| Ugcg          | UDP-glucose ceramide glucosyltransferase                | 2,39        | 3,45E-03 |
| Mboat1        | membrane bound O-acyltransferase domain containing 1    | 2,37        | 1,91E-02 |
| Ugcg          | UDP-glucose ceramide glucosyltransferase                | 2,35        | 2,17E-02 |
| Spats2        | spermatogenesis associated, serine-rich 2               | 2,35        | 4,89E-02 |
| Ampd1         | adenosine monophosphate deaminase 1                     | 2,32        | 1,62E-02 |
| Chsy1         | chondroitin sulfate synthase 1                          | 2,32        | 6,25E-03 |
| Gadd45b       | growth arrest and DNA-damage-inducible 45 beta          | 2,30        | 6,48E-03 |
| Coro2a        | coronin, actin binding protein 2A                       | 2,30        | 2,23E-02 |

|               |                                                                   |      |          |
|---------------|-------------------------------------------------------------------|------|----------|
| Gadd45b       | growth arrest and DNA-damage-inducible 45 beta                    | 2,27 | 4,39E-03 |
| AW061096      | expressed sequence AW061096                                       | 2,26 | 3,37E-05 |
| Spin2         | spindlin family, member 2                                         | 2,18 | 2,14E-02 |
| Runx3         | runt related transcription factor 3                               | 2,17 | 4,03E-02 |
| Igf1r         | insulin-like growth factor I receptor                             | 2,17 | 1,15E-03 |
| D630039A03Rik | RIKEN cDNA D630039A03 gene                                        | 2,16 | 2,68E-02 |
| Itih5         | inter-alpha (globulin) inhibitor H5                               | 2,12 | 8,83E-03 |
| Ms4a4c        | membrane-spanning 4-domains, subfamily A, member 4C               | 2,12 | 3,88E-02 |
| Ppm1l         | protein phosphatase 1 (formerly 2C)-like                          | 2,10 | 1,32E-02 |
| Spib          | Spi-B transcription factor (Spi-1/PU.1 related)                   | 2,09 | 1,51E-02 |
| Kmo           | kynurenine 3-monooxygenase (kynurenine 3-hydroxylase)             | 2,06 | 3,93E-02 |
| ErbB3         | v-erb-b2 erythroblastic leukemia viral oncogene homolog 3 (avian) | 2,02 | 2,82E-02 |
| Cobll1        | Cobl-like 1                                                       | 1,98 | 4,04E-02 |
| Relb          | avian reticuloendotheliosis viral (v-rel) oncogene related B      | 1,98 | 1,50E-02 |
| Dusp5         | dual specificity phosphatase 5                                    | 1,97 | 1,86E-03 |
| Egln3         | EGL nine homolog 3 (C. elegans)                                   | 1,95 | 6,92E-03 |
| Nab1          | Ngfi-A binding protein 1                                          | 1,95 | 2,54E-02 |
| Ly6a          | lymphocyte antigen 6 complex, locus A                             | 1,91 | 3,77E-02 |
| Bcl3          | B-cell leukemia/lymphoma 3                                        | 1,91 | 4,72E-02 |
| Tpm4          | tropomyosin 4                                                     | 1,91 | 4,29E-02 |
| Klf3          | Kruppel-like factor 3 (basic)                                     | 1,90 | 3,73E-02 |
| Stom          | stomatin                                                          | 1,89 | 2,83E-02 |
| Sdc1          | syndecan 1                                                        | 1,88 | 2,16E-02 |
| Sdc1          | syndecan 1                                                        | 1,86 | 3,42E-02 |
| Ccdc141       | coiled-coil domain containing 141                                 | 1,85 | 2,41E-02 |
| D18Ertd653e   | DNA segment, Chr 18, ERATO Doi 653, expressed                     | 1,84 | 4,15E-02 |
| Cnn3          | calponin 3, acidic                                                | 1,84 | 1,87E-02 |
| Ms4a6d        | membrane-spanning 4-domains, subfamily A, member 6D               | 1,83 | 4,43E-02 |
| Abcb1a        | ATP-binding cassette, sub-family B (MDR/TAP), member 1A           | 1,83 | 4,26E-02 |
| Tfrc          | transferrin receptor                                              | 1,83 | 2,48E-02 |
| Frmd4b        | FERM domain containing 4B                                         | 1,81 | 4,68E-02 |
| Stom          | stomatin                                                          | 1,81 | 2,56E-02 |
| Ddn           | dendrin                                                           | 1,81 | 4,64E-03 |
| 2510009E07Rik | RIKEN cDNA 2510009E07 gene                                        | 1,81 | 1,21E-03 |
| Cd24a         | CD24a antigen                                                     | 1,80 | 4,24E-02 |
| P2rx7         | purinergic receptor P2X, ligand-gated ion channel, 7              | 1,80 | 1,98E-02 |
| 2010007H06Rik | RIKEN cDNA 2010007H06 gene                                        | 1,78 | 1,15E-02 |
| P2rx7         | purinergic receptor P2X, ligand-gated ion channel, 7              | 1,77 | 3,24E-03 |
| Chchd10       | coiled-coil-helix-coiled-coil-helix domain containing 10          | 1,77 | 1,63E-02 |
| Itih5         | inter-alpha (globulin) inhibitor H5                               | 1,76 | 1,99E-04 |
| Chchd10       | coiled-coil-helix-coiled-coil-helix domain containing 10          | 1,76 | 3,30E-03 |
| Psrc1         | proline/serine-rich coiled-coil 1                                 | 1,76 | 1,48E-02 |
| Epsti1        | epithelial stromal interaction 1 (breast)                         | 1,76 | 2,69E-02 |
| Itih5         | inter-alpha (globulin) inhibitor H5                               | 1,75 | 5,46E-03 |
| Sdc1          | syndecan 1                                                        | 1,75 | 7,02E-03 |

|               |                                                                                              |      |          |
|---------------|----------------------------------------------------------------------------------------------|------|----------|
| Gpr65         | G-protein coupled receptor 65                                                                | 1,74 | 2,52E-02 |
| Cdk5r1        | cyclin-dependent kinase 5, regulatory subunit 1 (p35)                                        | 1,74 | 4,44E-02 |
| Grn           | granulin                                                                                     | 1,74 | 1,99E-02 |
| Cnn3          | calponin 3, acidic                                                                           | 1,73 | 9,87E-03 |
| Cdk5r1        | cyclin-dependent kinase 5, regulatory subunit 1 (p35)                                        | 1,73 | 8,73E-03 |
| Jakmip1       | janus kinase and microtubule interacting protein 1                                           | 1,72 | 2,84E-02 |
| Tnfsf10       | tumor necrosis factor (ligand) superfamily, member 10                                        | 1,72 | 4,62E-02 |
| 6530402F18Rik | RIKEN cDNA 6530402F18 gene                                                                   | 1,72 | 1,72E-02 |
| Nrarp         | Notch-regulated ankyrin repeat protein                                                       | 1,71 | 3,11E-02 |
| Pcyt1a        | phosphate cytidyltransferase 1, choline, alpha isoform                                       | 1,70 | 2,70E-02 |
| Grn           | granulin                                                                                     | 1,70 | 4,43E-02 |
| Fkbp1a        | FK506 binding protein 1a                                                                     | 1,69 | 2,55E-02 |
| Cnn3          | calponin 3, acidic                                                                           | 1,68 | 1,24E-02 |
| Dr1           | down-regulator of transcription 1                                                            | 1,68 | 7,77E-03 |
| Ugcg          | UDP-glucose ceramide glucosyltransferase                                                     | 1,68 | 1,90E-02 |
| Atl3          | atlastin GTPase 3                                                                            | 1,66 | 3,37E-02 |
| Serp1         | stress-associated endoplasmic reticulum protein 1                                            | 1,65 | 7,91E-03 |
| Abce1         | ATP-binding cassette, sub-family E (OABP), member 1                                          | 1,64 | 3,33E-02 |
| Ehd3          | EH-domain containing 3                                                                       | 1,64 | 2,70E-02 |
| Hopx          | HOP homeobox                                                                                 | 1,64 | 9,88E-04 |
| Bst2          | bone marrow stromal cell antigen 2                                                           | 1,64 | 1,09E-02 |
| Lpar4         | lysophosphatidic acid receptor 4                                                             | 1,63 | 3,22E-02 |
| Gpr25         | G protein-coupled receptor 25                                                                | 1,62 | 4,60E-02 |
| Spred1        | sprouty protein with EVH-1 domain 1, related sequence                                        | 1,62 | 3,40E-04 |
| ---           | ---                                                                                          | 1,61 | 4,55E-02 |
| Bdh1          | 3-hydroxybutyrate dehydrogenase, type 1                                                      | 1,61 | 4,50E-02 |
| Ptp4a3        | protein tyrosine phosphatase 4a3                                                             | 1,60 | 6,07E-03 |
| Plekha1       | pleckstrin homology domain containing, family A (phosphoinositide binding specific) member 1 | 1,59 | 2,04E-03 |
| Sdccag3       | serologically defined colon cancer antigen 3                                                 | 1,58 | 3,77E-02 |
| Stard3nl      | STARD3 N-terminal like                                                                       | 1,58 | 3,83E-02 |
| Camk4         | calcium/calmodulin-dependent protein kinase IV                                               | 1,57 | 3,53E-02 |
| Rpe           | ribulose-5-phosphate-3-epimerase                                                             | 1,57 | 3,49E-02 |
| Pdha1         | pyruvate dehydrogenase E1 alpha 1                                                            | 1,56 | 2,43E-02 |
| Als2cr12      | amyotrophic lateral sclerosis 2 (juvenile) chromosome region, candidate 12 (human)           | 1,56 | 7,43E-03 |
| Mgat5         | mannoside acetylglucosaminyltransferase 5                                                    | 1,56 | 2,15E-03 |
| Tg            | thyroglobulin                                                                                | 1,56 | 4,55E-02 |
| Ms4a6d        | membrane-spanning 4-domains, subfamily A, member 6D                                          | 1,56 | 1,75E-02 |
| Slc11a2       | solute carrier family 11 (proton-coupled divalent metal ion transporters), member 2          | 1,56 | 3,75E-02 |
| Dap           | death-associated protein                                                                     | 1,56 | 3,12E-02 |
| ---           | ---                                                                                          | 1,55 | 9,80E-03 |
| Cdv3          | carnitine deficiency-associated gene expressed in ventricle 3                                | 1,55 | 1,45E-02 |
| Api5          | apoptosis inhibitor 5                                                                        | 1,55 | 2,47E-02 |
| Bpnt1         | bisphosphate 3'-nucleotidase 1                                                               | 1,55 | 3,45E-02 |



|          |                                                 |      |          |
|----------|-------------------------------------------------|------|----------|
| Parp14   | poly (ADP-ribose) polymerase family, member 14  | 1,54 | 1,79E-02 |
| Hspa13   | heat shock protein 70 family, member 13         | 1,54 | 2,17E-02 |
| AI447881 | expressed sequence AI447881                     | 1,53 | 1,88E-04 |
| Nampt    | nicotinamide phosphoribosyltransferase          | 1,53 | 3,89E-02 |
| Zfp428   | zinc finger protein 428                         | 1,53 | 1,94E-02 |
| Amd1     | S-adenosylmethionine decarboxylase 1            | 1,53 | 4,09E-02 |
| Ier2     | immediate early response 2                      | 1,53 | 3,21E-02 |
| Prkca    | protein kinase C, alpha                         | 1,53 | 4,76E-02 |
| Orc1     | origin recognition complex, subunit 1           | 1,53 | 3,93E-02 |
| Endod1   | endonuclease domain containing 1                | 1,52 | 3,43E-02 |
| Iqgap2   | IQ motif containing GTPase activating protein 2 | 1,51 | 3,04E-02 |
| Ccdc102a | coiled-coil domain containing 102A              | 1,50 | 7,77E-03 |

668

669 Down-regulated probe sets upon NFAT inactivation

670

| Gene Symbol         | Gene Name                                                               | Fold-Change | P-Value  |
|---------------------|-------------------------------------------------------------------------|-------------|----------|
| Lamb1               | laminin B1                                                              | 4,54        | 1,27E-02 |
| Vcan                | versican                                                                | 4,31        | 1,02E-02 |
| Tcrg-V4             | T-cell receptor gamma, variable 4                                       | 3,99        | 1,11E-03 |
| 1110036O03Rik       | RIKEN cDNA 1110036O03 gene                                              | 3,91        | 3,44E-02 |
| Tcrg-V4             | T-cell receptor gamma, variable 4                                       | 3,70        | 8,23E-04 |
| Tcrg-V4             | T-cell receptor gamma, variable 4                                       | 3,50        | 1,91E-02 |
| Mpp4                | membrane protein, palmitoylated 4 (MAGUK p55 subfamily member 4)        | 3,42        | 1,62E-02 |
| Arrdc3              | arrestin domain containing 3                                            | 3,40        | 4,93E-02 |
| Ephx1               | epoxide hydrolase 1, microsomal                                         | 2,97        | 1,58E-02 |
| Gm14446             | predicted gene 14446                                                    | 2,88        | 1,24E-02 |
| Samd9l              | sterile alpha motif domain containing 9-like                            | 2,80        | 4,22E-02 |
| Neb1                | nebulin                                                                 | 2,69        | 2,60E-02 |
| 9530077C05Rik       | RIKEN cDNA 9530077C05 gene                                              | 2,69        | 6,21E-04 |
| Tns3                | tensin 3                                                                | 2,63        | 2,34E-02 |
| Arl4a               | ADP-ribosylation factor-like 4A                                         | 2,55        | 1,14E-02 |
| 4632428N05Rik       | RIKEN cDNA 4632428N05 gene                                              | 2,52        | 4,26E-02 |
| ---                 | ---                                                                     | 2,49        | 3,28E-02 |
| Lax1                | lymphocyte transmembrane adaptor 1                                      | 2,48        | 4,04E-02 |
| Evi5                | ecotropic viral integration site 5                                      | 2,45        | 3,61E-03 |
| Tox                 | thymocyte selection-associated high mobility group box                  | 2,44        | 4,19E-03 |
| Tox                 | thymocyte selection-associated high mobility group box                  | 2,40        | 7,91E-04 |
| Lamb1               | laminin B1                                                              | 2,38        | 4,85E-02 |
| Frat2               | frequently rearranged in advanced T-cell lymphomas 2                    | 2,36        | 1,13E-02 |
| Tcrg-V2 /// Tcrg-V3 | T-cell receptor gamma, variable 2 /// T-cell receptor gamma, variable 3 | 2,31        | 2,82E-02 |
| ---                 | ---                                                                     | 2,30        | 1,32E-02 |
| 9530028C05          | hypothetical protein 9530028C05                                         | 2,28        | 2,19E-02 |
| 9530077C05Rik       | RIKEN cDNA 9530077C05 gene                                              | 2,28        | 5,79E-05 |
| Ifngr1              | interferon gamma receptor 1                                             | 2,23        | 1,53E-02 |
| Evi5                | ecotropic viral integration site 5                                      | 2,22        | 5,67E-03 |
| 4930550C14Rik       | RIKEN cDNA 4930550C14 gene                                              | 2,21        | 1,69E-02 |
| Ube2e2              | ubiquitin-conjugating enzyme E2E 2 (UBC4/5 homolog, yeast)              | 2,18        | 1,89E-02 |
| Lmo4                | LIM domain only 4                                                       | 2,17        | 3,93E-02 |
| Gbp6                | guanylate binding protein 6                                             | 2,15        | 2,57E-03 |
| Parm1               | prostate androgen-regulated mucin-like protein 1                        | 2,14        | 4,84E-02 |
| Fhit                | fragile histidine triad gene                                            | 2,12        | 2,41E-03 |
| Ypel2               | yippee-like 2 (Drosophila)                                              | 2,08        | 2,97E-03 |
| Carns1              | carnosine synthase 1                                                    | 2,05        | 3,08E-02 |
| ---                 | ---                                                                     | 2,03        | 3,28E-02 |
| Ahnak               | AHNAK nucleoprotein (desmoyokin)                                        | 2,03        | 6,87E-03 |
| BB165335            | expressed sequence BB165335                                             | 2,01        | 4,52E-02 |

|                      |                                                                      |      |          |
|----------------------|----------------------------------------------------------------------|------|----------|
| <b>Usp3</b>          | ubiquitin specific peptidase 3                                       | 2,01 | 2,95E-02 |
| <b>Fxyd5</b>         | FXID domain-containing ion transport regulator 5                     | 1,99 | 1,02E-03 |
| <b>Spsb4</b>         | splA/ryanodine receptor domain and SOCS box containing 4             | 1,98 | 2,54E-02 |
| <b>Cass4</b>         | Cas scaffolding protein family member 4                              | 1,96 | 4,39E-02 |
| <b>Gbp6</b>          | guanylate binding protein 6                                          | 1,95 | 1,75E-02 |
| <b>AW050198</b>      | expressed sequence AW050198                                          | 1,94 | 3,69E-02 |
| <b>Nr3c2</b>         | nuclear receptor subfamily 3, group C, member 2                      | 1,93 | 4,42E-02 |
| <b>Ypel2</b>         | yippee-like 2 (Drosophila)                                           | 1,93 | 1,68E-02 |
| <b>ldh3a</b>         | isocitrate dehydrogenase 3 (NAD+) alpha                              | 1,91 | 1,49E-02 |
| <b>Plcx2</b>         | phosphatidylinositol-specific phospholipase C, X domain containing 2 | 1,90 | 1,32E-02 |
| <b>Themis</b>        | Thymocyte selection associated                                       | 1,89 | 4,38E-02 |
| <b>Hspa4l</b>        | heat shock protein 4 like                                            | 1,88 | 4,00E-03 |
| <b>Usp3</b>          | ubiquitin specific peptidase 3                                       | 1,88 | 4,68E-02 |
| <b>Gjc1</b>          | gap junction protein, gamma 1                                        | 1,88 | 6,54E-03 |
| <b>Aldh6a1</b>       | aldehyde dehydrogenase family 6, subfamily A1                        | 1,87 | 3,92E-02 |
| <b>LOC545086</b>     | hypothetical protein LOC545086                                       | 1,87 | 9,15E-03 |
| <b>Slc45a3</b>       | solute carrier family 45, member 3                                   | 1,87 | 1,31E-02 |
| <b>Prkch</b>         | protein kinase C, eta                                                | 1,86 | 1,56E-03 |
| <b>Pkig</b>          | protein kinase inhibitor, gamma                                      | 1,85 | 2,73E-02 |
| <b>Mtss1</b>         | metastasis suppressor 1                                              | 1,85 | 6,31E-03 |
| <b>Cdh22</b>         | cadherin 22                                                          | 1,85 | 4,24E-02 |
| ---                  | ---                                                                  | 1,84 | 1,61E-02 |
| <b>Rgs2</b>          | regulator of G-protein signaling 2                                   | 1,84 | 2,58E-04 |
| <b>AI661384</b>      | expressed sequence AI661384                                          | 1,83 | 3,00E-02 |
| <b>D1Ert564e</b>     | DNA segment, Chr 1, ERATO Doi 564, expressed                         | 1,82 | 6,99E-03 |
| ---                  | ---                                                                  | 1,81 | 2,28E-02 |
| ---                  | ---                                                                  | 1,81 | 1,46E-02 |
| <b>Trem12</b>        | triggering receptor expressed on myeloid cells-like 2                | 1,81 | 1,49E-02 |
| ---                  | ---                                                                  | 1,80 | 2,76E-02 |
| ---                  | ---                                                                  | 1,80 | 1,77E-02 |
| <b>Ikzf3</b>         | IKAROS family zinc finger 3                                          | 1,79 | 4,52E-02 |
| <b>Hspa4l</b>        | heat shock protein 4 like                                            | 1,79 | 2,00E-02 |
| ---                  | ---                                                                  | 1,78 | 4,31E-02 |
| <b>Dnajb4</b>        | DnaJ (Hsp40) homolog, subfamily B, member 4                          | 1,78 | 9,36E-04 |
| <b>E230032D23Rik</b> | RIKEN cDNA E230032D23 gene                                           | 1,77 | 1,11E-03 |
| <b>Mtss1</b>         | metastasis suppressor 1                                              | 1,77 | 1,40E-02 |
| <b>Ampd3</b>         | adenosine monophosphate deaminase 3                                  | 1,76 | 4,83E-02 |
| <b>Tpp1</b>          | tripeptidyl peptidase I                                              | 1,76 | 2,87E-02 |
| <b>Sgk1</b>          | serum/glucocorticoid regulated kinase 1                              | 1,75 | 3,68E-02 |
| ---                  | ---                                                                  | 1,75 | 3,80E-02 |
| <b>Tmem218</b>       | transmembrane protein 218                                            | 1,75 | 2,20E-02 |
| <b>Gmfg</b>          | glia maturation factor, gamma                                        | 1,75 | 4,87E-02 |
| ---                  | ---                                                                  | 1,75 | 4,17E-02 |
| <b>Nedd4</b>         | neural precursor cell expressed, developmentally down-regulated 4    | 1,75 | 1,97E-02 |

|                                     |                                                                                          |      |          |
|-------------------------------------|------------------------------------------------------------------------------------------|------|----------|
| <b>Tpcn1</b>                        | two pore channel 1                                                                       | 1,75 | 4,20E-03 |
| <b>E330018D03Rik</b>                | RIKEN cDNA E330018D03 gene                                                               | 1,74 | 4,11E-02 |
| <b>Gm5914</b>                       | predicted gene 5914                                                                      | 1,74 | 3,13E-02 |
| <b>Sesn1</b>                        | sestrin 1                                                                                | 1,74 | 1,84E-02 |
| <b>Sesn1</b>                        | sestrin 1                                                                                | 1,73 | 2,85E-02 |
| <b>9530077C05Rik</b>                | RIKEN cDNA 9530077C05 gene                                                               | 1,73 | 2,04E-02 |
| ---                                 | ---                                                                                      | 1,73 | 3,77E-02 |
| <b>Sesn1</b>                        | sestrin 1                                                                                | 1,72 | 2,86E-02 |
| <b>Spata6</b>                       | spermatogenesis associated 6                                                             | 1,72 | 1,26E-02 |
| <b>H2-Q2</b>                        | histocompatibility 2, Q region locus 2                                                   | 1,71 | 8,79E-03 |
| <b>Slc38a9</b>                      | solute carrier family 38, member 9                                                       | 1,71 | 4,29E-02 |
| <b>4921509J17Rik<br/>/// Hspa4l</b> | RIKEN cDNA 4921509J17 gene /// heat shock protein 4 like                                 | 1,71 | 3,65E-02 |
| <b>4930578N16Rik</b>                | RIKEN cDNA 4930578N16 gene                                                               | 1,71 | 9,29E-03 |
| <b>Ramp1</b>                        | receptor (calcitonin) activity modifying protein 1                                       | 1,70 | 1,36E-02 |
| <b>Gch1</b>                         | GTP cyclohydrolase 1                                                                     | 1,70 | 1,75E-03 |
| <b>Pde4dip</b>                      | phosphodiesterase 4D interacting protein (myomegalin)                                    | 1,70 | 3,03E-02 |
| <b>Plcx2</b>                        | phosphatidylinositol-specific phospholipase C, X domain containing 2                     | 1,70 | 6,54E-03 |
| <b>Ncoa1</b>                        | nuclear receptor coactivator 1                                                           | 1,69 | 1,32E-02 |
| <b>AI426330</b>                     | expressed sequence AI426330                                                              | 1,69 | 2,19E-02 |
| <b>Sacm1l</b>                       | SAC1 (suppressor of actin mutations 1, homolog)-like ( <i>S. cerevisiae</i> )            | 1,69 | 4,49E-02 |
| <b>Bzrap1</b>                       | benzodiazapine receptor associated protein 1                                             | 1,68 | 3,89E-03 |
| <b>Spsb4</b>                        | splA/ryanodine receptor domain and SOCS box containing 4                                 | 1,68 | 4,13E-02 |
| ---                                 | ---                                                                                      | 1,68 | 3,20E-02 |
| <b>Csrnp1</b>                       | cysteine-serine-rich nuclear protein 1                                                   | 1,67 | 2,09E-02 |
| <b>9630013D21Rik</b>                | RIKEN cDNA 9630013D21 gene                                                               | 1,67 | 1,03E-02 |
| <b>Amn1</b>                         | Antagonist of mitotic exit network 1 homolog ( <i>S. cerevisiae</i> )                    | 1,67 | 1,13E-02 |
| <b>Cd84</b>                         | CD84 antigen                                                                             | 1,67 | 2,60E-02 |
| <b>Scai</b>                         | suppressor of cancer cell invasion                                                       | 1,67 | 5,00E-03 |
| <b>Rilpl2</b>                       | Rab interacting lysosomal protein-like 2                                                 | 1,67 | 2,70E-03 |
| <b>Ddhd2</b>                        | DDHD domain containing 2                                                                 | 1,66 | 6,23E-03 |
| <b>Slc12a6</b>                      | solute carrier family 12, member 6                                                       | 1,66 | 2,27E-02 |
| <b>Trip4</b>                        | thyroid hormone receptor interactor 4                                                    | 1,66 | 4,05E-02 |
| <b>2010004M13Rik</b>                | RIKEN cDNA 2010004M13 gene                                                               | 1,66 | 3,36E-02 |
| <b>Foxp1</b>                        | Forkhead box P1                                                                          | 1,66 | 3,97E-02 |
| <b>Ldlrap1</b>                      | low density lipoprotein receptor adaptor protein 1                                       | 1,66 | 3,46E-02 |
| <b>3110057O12Rik<br/>/// Gm2011</b> | RIKEN cDNA 3110057O12 gene /// predicted gene 2011                                       | 1,65 | 3,39E-02 |
| <b>Dnahc8</b>                       | dynein, axonemal, heavy chain 8                                                          | 1,64 | 2,08E-02 |
| ---                                 | ---                                                                                      | 1,64 | 1,81E-02 |
| <b>Atp5c1</b>                       | ATP synthase, H <sup>+</sup> transporting, mitochondrial F1 complex, gamma polypeptide 1 | 1,64 | 4,40E-02 |
| <b>Tmem19</b>                       | Transmembrane protein 19                                                                 | 1,64 | 4,60E-02 |
| <b>Ncoa1</b>                        | nuclear receptor coactivator 1                                                           | 1,64 | 1,58E-02 |

|                      |                                                                                       |      |          |
|----------------------|---------------------------------------------------------------------------------------|------|----------|
| <b>2900056M20Rik</b> | RIKEN cDNA 2900056M20 gene                                                            | 1,63 | 4,32E-02 |
| <b>Phf6</b>          | PHD finger protein 6                                                                  | 1,63 | 2,20E-03 |
| <b>Pcmdt2</b>        | protein-L-isoaspartate (D-aspartate) O-methyltransferase domain containing 2          | 1,62 | 4,13E-02 |
| <b>Setd4</b>         | SET domain containing 4                                                               | 1,62 | 4,25E-02 |
| <b>Arpp21</b>        | cyclic AMP-regulated phosphoprotein, 21                                               | 1,62 | 1,33E-02 |
| <b>Satb1</b>         | special AT-rich sequence binding protein 1                                            | 1,61 | 3,96E-02 |
| ---                  | ---                                                                                   | 1,61 | 3,14E-02 |
| <b>Lman2l</b>        | lectin, mannose-binding 2-like                                                        | 1,61 | 2,90E-02 |
| <b>Cfl2</b>          | cofilin 2, muscle                                                                     | 1,61 | 1,87E-02 |
| <b>Pnrc1</b>         | proline-rich nuclear receptor coactivator 1                                           | 1,61 | 3,23E-02 |
| <b>Gse1</b>          | genetic suppressor element 1                                                          | 1,61 | 1,67E-02 |
| <b>Gtdc1</b>         | glycosyltransferase-like domain containing 1                                          | 1,60 | 4,90E-02 |
| <b>Ramp1</b>         | receptor (calcitonin) activity modifying protein 1                                    | 1,60 | 1,84E-03 |
| <b>Fam199x</b>       | family with sequence similarity 199, X-linked                                         | 1,60 | 1,97E-02 |
| ---                  | ---                                                                                   | 1,60 | 2,05E-02 |
| <b>Pyhin1</b>        | pyrin and HIN domain family, member 1                                                 | 1,60 | 2,65E-02 |
| <b>Col27a1</b>       | collagen, type XXVII, alpha 1                                                         | 1,60 | 4,29E-02 |
| <b>Ppp1r3b</b>       | protein phosphatase 1, regulatory (inhibitor) subunit 3B                              | 1,60 | 3,79E-02 |
| <b>Nedd4</b>         | neural precursor cell expressed, developmentally down-regulated 4                     | 1,59 | 1,17E-02 |
| <b>Tube1</b>         | epsilon-tubulin 1                                                                     | 1,59 | 4,04E-02 |
| <b>Vamp4</b>         | vesicle-associated membrane protein 4                                                 | 1,59 | 6,33E-03 |
| <b>Pkig</b>          | protein kinase inhibitor, gamma                                                       | 1,59 | 2,60E-02 |
| <b>Stat5b</b>        | signal transducer and activator of transcription 5B                                   | 1,59 | 3,41E-02 |
| <b>Slc12a6</b>       | solute carrier family 12, member 6                                                    | 1,59 | 2,43E-02 |
| <b>Hspa4l</b>        | heat shock protein 4 like                                                             | 1,59 | 4,88E-02 |
| <b>Nudt16</b>        | nudix (nucleoside diphosphate linked moiety X)-type motif 16                          | 1,58 | 2,84E-02 |
| <b>Dedd2</b>         | death effector domain-containing DNA binding protein 2                                | 1,58 | 4,42E-03 |
| <b>Tmbim1</b>        | transmembrane BAX inhibitor motif containing 1                                        | 1,58 | 2,12E-02 |
| <b>Slc44a2</b>       | solute carrier family 44, member 2                                                    | 1,58 | 2,98E-02 |
| <b>Fam199x</b>       | family with sequence similarity 199, X-linked                                         | 1,58 | 1,39E-03 |
| ---                  | ---                                                                                   | 1,57 | 2,64E-02 |
| <b>Parp16</b>        | poly (ADP-ribose) polymerase family, member 16                                        | 1,57 | 6,99E-03 |
| <b>Arrb1</b>         | arrestin, beta 1                                                                      | 1,57 | 2,79E-02 |
| <b>Col27a1</b>       | collagen, type XXVII, alpha 1                                                         | 1,57 | 4,09E-02 |
| <b>Naip6</b>         | NLR family, apoptosis inhibitory protein 6                                            | 1,57 | 2,56E-02 |
| <b>Fut8</b>          | fucosyltransferase 8                                                                  | 1,57 | 1,35E-02 |
| <b>Acp5</b>          | acid phosphatase 5, tartrate resistant                                                | 1,57 | 7,14E-03 |
| <b>Skiv2l2</b>       | superkiller viralicidic activity 2-like 2 ( <i>S. cerevisiae</i> )                    | 1,56 | 1,84E-02 |
| <b>A630033H20Rik</b> | RIKEN cDNA A630033H20 gene                                                            | 1,56 | 2,13E-02 |
| <b>Rcctb2</b>        | regulator of chromosome condensation (RCC1) and BTB (POZ) domain containing protein 2 | 1,56 | 2,42E-03 |
| <b>Lman2l</b>        | lectin, mannose-binding 2-like                                                        | 1,56 | 1,72E-02 |
| <b>LOC100044751</b>  | hypothetical LOC100044751                                                             | 1,56 | 4,93E-02 |
| <b>Hist2h2be</b>     | histone cluster 2, H2be                                                               | 1,56 | 2,25E-02 |

|                      |                                                                          |      |          |
|----------------------|--------------------------------------------------------------------------|------|----------|
| <b>Rdh10</b>         | retinol dehydrogenase 10 (all-trans)                                     | 1,56 | 4,05E-02 |
| <b>Rere</b>          | arginine glutamic acid dipeptide (RE) repeats                            | 1,55 | 2,78E-02 |
| <b>Sfrs18</b>        | serine/arginine-rich splicing factor 18                                  | 1,55 | 2,88E-02 |
| <b>Atp2a3</b>        | ATPase, Ca <sup>++</sup> transporting, ubiquitous                        | 1,55 | 1,40E-02 |
| <b>Mbtd1</b>         | mbt domain containing 1                                                  | 1,55 | 1,13E-02 |
| <b>Mthfd2l</b>       | methylenetetrahydrofolate dehydrogenase (NADP+ dependent) 2-like         | 1,55 | 1,43E-02 |
| <b>Atg12</b>         | autophagy-related 12 (yeast)                                             | 1,54 | 7,23E-03 |
| <b>Abhd8</b>         | abhydrolase domain containing 8                                          | 1,54 | 1,89E-02 |
| <b>Itpkb</b>         | inositol 1,4,5-trisphosphate 3-kinase B                                  | 1,54 | 4,09E-02 |
| <b>Slc45a3</b>       | solute carrier family 45, member 3                                       | 1,54 | 3,89E-02 |
| <b>Bach1</b>         | BTB and CNC homology 1                                                   | 1,54 | 1,48E-03 |
| ---                  | ---                                                                      | 1,54 | 3,55E-02 |
| <b>Slc44a2</b>       | solute carrier family 44, member 2                                       | 1,54 | 2,11E-02 |
| <b>Zfp182</b>        | zinc finger protein 182                                                  | 1,53 | 8,44E-03 |
| <b>Fam53b</b>        | family with sequence similarity 53, member B                             | 1,53 | 2,16E-02 |
| <b>Pdk1</b>          | pyruvate dehydrogenase kinase, isoenzyme 1                               | 1,53 | 3,59E-03 |
| <b>LOC620419</b>     | zinc finger protein 669-like                                             | 1,53 | 2,89E-02 |
| <b>Pdk1</b>          | pyruvate dehydrogenase kinase, isoenzyme 1                               | 1,52 | 1,35E-02 |
| <b>Cd96</b>          | CD96 antigen                                                             | 1,52 | 1,45E-05 |
| <b>Pip4k2a</b>       | phosphatidylinositol-5-phosphate 4-kinase, type II, alpha                | 1,52 | 5,73E-03 |
| <b>D230044B12Rik</b> | RIKEN cDNA D230044B12 gene                                               | 1,52 | 3,06E-02 |
| <b>Lyst</b>          | lysosomal trafficking regulator                                          | 1,52 | 2,67E-02 |
| <b>Sfrs18</b>        | serine/arginine-rich splicing factor 18                                  | 1,52 | 3,39E-02 |
| <b>LOC100502594</b>  | hypothetical LOC100502594                                                | 1,52 | 4,07E-02 |
| <b>Prex1</b>         | phosphatidylinositol-3,4,5-trisphosphate-dependent Rac exchange factor 1 | 1,51 | 2,74E-02 |
| <b>Xpr1</b>          | xenotropic and polytropic retrovirus receptor 1                          | 1,51 | 4,64E-02 |
| <b>1700097N02Rik</b> | RIKEN cDNA 1700097N02 gene                                               | 1,51 | 2,27E-02 |
| ---                  | ---                                                                      | 1,51 | 3,27E-02 |
| <b>Akap8l</b>        | A kinase (PRKA) anchor protein 8-like                                    | 1,51 | 1,97E-04 |
| <b>Dpp4</b>          | dipeptidylpeptidase 4                                                    | 1,51 | 1,19E-02 |
| ---                  | ---                                                                      | 1,51 | 1,58E-02 |
| <b>Cxhc5</b>         | CXXC finger 5                                                            | 1,51 | 1,42E-02 |
| <b>Map4k3</b>        | mitogen-activated protein kinase kinase kinase kinase 3                  | 1,51 | 2,98E-02 |
| <b>Tbc1d14</b>       | TBC1 domain family, member 14                                            | 1,50 | 1,74E-02 |
| <b>Otos</b>          | otospiralin                                                              | 1,50 | 4,84E-02 |
| <b>Atr</b>           | Ataxia telangiectasia and Rad3 related                                   | 1,50 | 3,43E-02 |
| ---                  | ---                                                                      | 1,50 | 4,65E-02 |

671  
672



674 **Supplementary Table 3. Overlap between NFAT- and Calcineurin-dependent**  
 675 **transcriptomes**

676  
 677  
 678  
 679  
 680

**Common up-regulated probe sets in NFAT or CnB inactivated T-ALL cells**

| Gene Symbol   | Gene Name                                                         | NFAT        |          | CnB         |          |
|---------------|-------------------------------------------------------------------|-------------|----------|-------------|----------|
|               |                                                                   | Fold-Change | P-Value  | Fold-Change | P-Value  |
| Pou2af1       | POU domain, class 2, associating factor 1                         | 4,10        | 3,42E-02 | 1,75        | 2,29E-02 |
| 5830411N06Rik | RIKEN cDNA 5830411N06 gene                                        | 3,63        | 1,17E-03 | 1,86        | 3,93E-03 |
| Cdyl2         | chromodomain protein, Y chromosome-like 2                         | 3,38        | 1,08E-02 | 1,97        | 1,72E-03 |
| Fam183b       | family with sequence similarity 183, member B                     | 3,27        | 2,40E-02 | 2,73        | 4,72E-02 |
| Gimap7        | GTPase, IMAP family member 7                                      | 3,23        | 1,97E-02 | 2,50        | 1,52E-02 |
| Cd163l1       | CD163 molecule-like 1                                             | 3,19        | 1,13E-02 | 1,88        | 4,62E-02 |
| 2810459M11Rik | RIKEN cDNA 2810459M11 gene                                        | 3,18        | 1,54E-03 | 2,24        | 1,34E-03 |
| Bex6          | brain expressed gene 6                                            | 3,15        | 2,11E-02 | 1,73        | 2,31E-03 |
| Stc1          | stanniocalcin 1                                                   | 2,88        | 1,12E-02 | 2,15        | 3,04E-02 |
| Cdkn1a        | cyclin-dependent kinase inhibitor 1A (P21)                        | 2,74        | 1,30E-02 | 2,49        | 2,48E-03 |
| Cdkn1a        | cyclin-dependent kinase inhibitor 1A (P21)                        | 2,73        | 4,03E-02 | 3,45        | 4,21E-04 |
| Irf4          | interferon regulatory factor 4                                    | 2,73        | 1,57E-03 | 1,89        | 2,60E-05 |
| Gjb2          | gap junction protein, beta 2                                      | 2,68        | 6,48E-03 | 5,16        | 4,44E-04 |
| Cdyl2         | Chromodomain protein, Y chromosome-like 2                         | 2,66        | 2,70E-02 | 2,31        | 1,24E-03 |
| Abcb1b        | ATP-binding cassette, sub-family B (MDR/TAP), member 1B           | 2,54        | 3,29E-03 | 1,71        | 1,07E-02 |
| Nr4a1         | nuclear receptor subfamily 4, group A, member 1                   | 2,53        | 2,31E-02 | 5,64        | 8,89E-04 |
| Ugcg          | UDP-glucose ceramide glucosyltransferase                          | 2,39        | 3,45E-03 | 1,86        | 3,15E-03 |
| Ugcg          | UDP-glucose ceramide glucosyltransferase                          | 2,35        | 2,17E-02 | 1,87        | 2,53E-03 |
| Chsy1         | chondroitin sulfate synthase 1                                    | 2,32        | 6,25E-03 | 1,96        | 4,76E-03 |
| Spin2         | spindlin family, member 2                                         | 2,18        | 2,14E-02 | 1,60        | 2,63E-02 |
| Igf1r         | insulin-like growth factor I receptor                             | 2,17        | 1,15E-03 | 1,67        | 3,53E-02 |
| Itih5         | inter-alpha (globulin) inhibitor H5                               | 2,12        | 8,83E-03 | 2,52        | 3,57E-03 |
| Ppm1l         | protein phosphatase 1 (formerly 2C)-like                          | 2,10        | 1,32E-02 | 1,86        | 6,80E-04 |
| ErbB3         | v-erb-b2 erythroblastic leukemia viral oncogene homolog 3 (avian) | 2,02        | 2,82E-02 | 3,47        | 6,16E-03 |



|               |                                                              |      |          |      |          |
|---------------|--------------------------------------------------------------|------|----------|------|----------|
| Cobll1        | Cobl-like 1                                                  | 1,98 | 4,04E-02 | 1,55 | 4,47E-02 |
| Relb          | avian reticuloendotheliosis viral (v-rel) oncogene related B | 1,98 | 1,50E-02 | 1,63 | 1,09E-03 |
| Dusp5         | dual specificity phosphatase 5                               | 1,97 | 1,86E-03 | 2,54 | 2,98E-04 |
| Egln3         | EGL nine homolog 3 (C. elegans)                              | 1,95 | 6,92E-03 | 1,72 | 8,21E-04 |
| Ly6a          | lymphocyte antigen 6 complex, locus A                        | 1,91 | 3,77E-02 | 2,34 | 8,96E-03 |
| Klf3          | Kruppel-like factor 3 (basic)                                | 1,90 | 3,73E-02 | 1,71 | 1,74E-02 |
| D18Ert653e    | DNA segment, Chr 18, ERATO Doi 653, expressed                | 1,84 | 4,15E-02 | 2,16 | 4,27E-03 |
| Ms4a6d        | membrane-spanning 4-domains, subfamily A, member 6D          | 1,83 | 4,43E-02 | 1,78 | 1,04E-02 |
| Abcb1a        | ATP-binding cassette, sub-family B (MDR/TAP), member 1A      | 1,83 | 4,26E-02 | 3,20 | 1,72E-02 |
| Ddn           | dendrin                                                      | 1,81 | 4,64E-03 | 2,04 | 4,88E-04 |
| 2510009E07Rik | RIKEN cDNA 2510009E07 gene                                   | 1,81 | 1,21E-03 | 2,06 | 1,14E-03 |
| Cd24a         | CD24a antigen                                                | 1,80 | 4,24E-02 | 1,61 | 1,12E-03 |
| Chchd10       | coiled-coil-helix-coiled-coil-helix domain containing 10     | 1,77 | 1,63E-02 | 1,84 | 1,37E-03 |
| Itih5         | inter-alpha (globulin) inhibitor H5                          | 1,76 | 1,99E-04 | 2,65 | 5,28E-03 |
| Chchd10       | coiled-coil-helix-coiled-coil-helix domain containing 10     | 1,76 | 3,30E-03 | 1,80 | 6,42E-03 |
| Epsti1        | epithelial stromal interaction 1 (breast)                    | 1,76 | 2,69E-02 | 1,98 | 8,00E-04 |
| Itih5         | inter-alpha (globulin) inhibitor H5                          | 1,75 | 5,46E-03 | 2,05 | 1,23E-02 |
| Jakmip1       | janus kinase and microtubule interacting protein 1           | 1,72 | 2,84E-02 | 1,72 | 3,37E-03 |
| Ugcg          | UDP-glucose ceramide glucosyltransferase                     | 1,68 | 1,90E-02 | 1,76 | 1,14E-03 |
| Abce1         | ATP-binding cassette, sub-family E (OABP), member 1          | 1,64 | 3,33E-02 | 1,61 | 3,71E-02 |
| Ehd3          | EH-domain containing 3                                       | 1,64 | 2,70E-02 | 1,93 | 9,71E-03 |
| ---           | ---                                                          | 1,61 | 4,55E-02 | 1,72 | 2,74E-02 |
| Ptp4a3        | protein tyrosine phosphatase 4a3                             | 1,60 | 6,07E-03 | 1,75 | 9,21E-03 |
| Mgat5         | mannoside acetylglucosaminyltransferase 5                    | 1,56 | 2,15E-03 | 2,00 | 1,77E-03 |
| Ier2          | immediate early response 2                                   | 1,53 | 3,21E-02 | 1,56 | 1,55E-02 |
| Iqgap2        | IQ motif containing GTPase activating protein 2              | 1,51 | 3,04E-02 | 1,55 | 3,29E-02 |
| Ehd3          | EH-domain containing 3                                       | 1,50 | 1,52E-01 | 1,71 | 7,26E-03 |

681

682  
683  
684

## Common down-regulated probe sets in NFAT or CnB inactivated T-ALL cells

| Gene Symbol         | Gene Name                                                               | NFAT        |          | CnB         |          |
|---------------------|-------------------------------------------------------------------------|-------------|----------|-------------|----------|
|                     |                                                                         | Fold-Change | P-Value  | Fold-Change | P-Value  |
| Lamb1               | laminin B1                                                              | 4,54        | 1,27E-02 | 2,98        | 4,65E-02 |
| Tcrg-V4             | T-cell receptor gamma, variable 4                                       | 3,99        | 1,11E-03 | 2,31        | 1,80E-02 |
| Tcrg-V4             | T-cell receptor gamma, variable 4                                       | 3,70        | 8,23E-04 | 2,22        | 2,01E-02 |
| Tcrg-V4             | T-cell receptor gamma, variable 4                                       | 3,50        | 1,91E-02 | 2,69        | 1,74E-02 |
| Ephx1               | epoxide hydrolase 1, microsomal                                         | 2,97        | 1,58E-02 | 4,34        | 5,28E-04 |
| Samd9l              | sterile alpha motif domain containing 9-like                            | 2,80        | 4,22E-02 | 2,44        | 3,92E-02 |
| 9530077C05Rik       | RIKEN cDNA 9530077C05 gene                                              | 2,69        | 6,21E-04 | 2,14        | 1,63E-02 |
| Tns3                | tensin 3                                                                | 2,63        | 2,34E-02 | 2,42        | 1,48E-02 |
| Arl4a               | ADP-ribosylation factor-like 4A                                         | 2,55        | 1,14E-02 | 2,03        | 2,58E-02 |
| Evi5                | ecotropic viral integration site 5                                      | 2,45        | 3,61E-03 | 2,25        | 1,49E-03 |
| Tox                 | thymocyte selection-associated high mobility group box                  | 2,44        | 4,19E-03 | 2,03        | 1,08E-02 |
| Tox                 | thymocyte selection-associated high mobility group box                  | 2,40        | 7,91E-04 | 1,96        | 1,22E-02 |
| Frat2               | frequently rearranged in advanced T-cell lymphomas 2                    | 2,36        | 1,13E-02 | 3,16        | 2,71E-03 |
| Tcrg-V2 /// Tcrg-V3 | T-cell receptor gamma, variable 2 /// T-cell receptor gamma, variable 3 | 2,31        | 2,82E-02 | 2,26        | 2,37E-02 |
| 9530077C05Rik       | RIKEN cDNA 9530077C05 gene                                              | 2,28        | 5,79E-05 | 2,24        | 1,63E-03 |
| Evi5                | ecotropic viral integration site 5                                      | 2,22        | 5,67E-03 | 2,02        | 1,86E-03 |
| Lmo4                | LIM domain only 4                                                       | 2,17        | 3,93E-02 | 2,11        | 1,65E-02 |
| Parm1               | prostate androgen-regulated mucin-like protein 1                        | 2,14        | 4,84E-02 | 1,89        | 8,04E-03 |
| Usp3                | ubiquitin specific peptidase 3                                          | 2,01        | 2,95E-02 | 1,52        | 4,31E-03 |
| Hspa4l              | heat shock protein 4 like                                               | 1,88        | 4,00E-03 | 1,52        | 2,06E-02 |
| Gjc1                | gap junction protein, gamma 1                                           | 1,88        | 6,54E-03 | 2,54        | 1,91E-03 |
| Aldh6a1             | aldehyde dehydrogenase family 6, subfamily A1                           | 1,87        | 3,92E-02 | 1,61        | 1,24E-02 |
| Prkch               | protein kinase C, eta                                                   | 1,86        | 1,56E-03 | 1,56        | 6,17E-03 |
| Pkig                | protein kinase inhibitor, gamma                                         | 1,85        | 2,73E-02 | 1,59        | 5,56E-03 |
| Ikzf3               | IKAROS family zinc finger 3                                             | 1,79        | 4,52E-02 | 1,68        | 7,44E-03 |
| Hspa4l              | heat shock protein 4 like                                               | 1,79        | 2,00E-02 | 1,86        | 1,36E-02 |
| Ampd3               | adenosine monophosphate deaminase 3                                     | 1,76        | 4,83E-02 | 1,65        | 2,35E-02 |
| 9530077C05Rik       | RIKEN cDNA 9530077C05 gene                                              | 1,73        | 2,04E-02 | 2,26        | 3,82E-03 |
| Spata6              | spermatogenesis associated 6                                            | 1,72        | 1,26E-02 | 1,55        | 3,13E-02 |
| 4921509J17Rik ///   | RIKEN cDNA 4921509J17 gene /// heat shock protein 4 like                | 1,71        | 3,65E-02 | 1,75        | 1,71E-02 |

| Hspa4l            |                                                        |      |          |      |          |
|-------------------|--------------------------------------------------------|------|----------|------|----------|
| Tox               | thymocyte selection-associated high mobility group box | 1,71 | 2,22E-01 | 1,99 | 8,15E-03 |
| Rilpl2            | Rab interacting lysosomal protein-like 2               | 1,67 | 2,70E-03 | 1,92 | 3,71E-04 |
| Ddhd2             | DDHD domain containing 2                               | 1,66 | 6,23E-03 | 1,60 | 2,51E-02 |
| Ldlrap1           | low density lipoprotein receptor adaptor protein 1     | 1,66 | 3,46E-02 | 1,78 | 7,39E-03 |
| Col27a1           | collagen, type XXVII, alpha 1                          | 1,60 | 4,29E-02 | 2,09 | 4,85E-03 |
| Hspa4l            | heat shock protein 4 like                              | 1,59 | 4,88E-02 | 1,68 | 1,05E-02 |
| Tmbim1            | transmembrane BAX inhibitor motif containing 1         | 1,58 | 2,12E-02 | 1,80 | 1,87E-03 |
| Slc44a2           | solute carrier family 44, member 2                     | 1,58 | 2,98E-02 | 1,50 | 1,35E-02 |
| Parp16            | poly (ADP-ribose) polymerase family, member 16         | 1,57 | 6,99E-03 | 1,62 | 1,51E-02 |
| Col27a1           | collagen, type XXVII, alpha 1                          | 1,57 | 4,09E-02 | 2,01 | 3,30E-03 |
| Acp5              | acid phosphatase 5, tartrate resistant                 | 1,57 | 7,14E-03 | 1,60 | 1,73E-03 |
| A630033H<br>20Rik | RIKEN cDNA A630033H20 gene                             | 1,56 | 2,13E-02 | 1,53 | 2,32E-02 |
| 1700097N<br>02Rik | RIKEN cDNA 1700097N02 gene                             | 1,51 | 2,27E-02 | 1,59 | 7,63E-03 |
| Otos              | otospiralin                                            | 1,50 | 4,84E-02 | 1,50 | 8,08E-03 |

685

686

687 **SUPPLEMENTAL MATERIELS AND METHODS**

688 Cell culture. MS5 (mouse) bone marrow-derived stromal cells were maintained in  $\alpha$ MEM  
689 (Invitrogen) supplemented with 10% heat-inactivated fetal bovine serum (FBS) (Invitrogen).  
690 NIH-3T3 (mouse) cells were maintained in DMEM (Invitrogen) supplemented with 10% heat-  
691 inactivated donor bovine serum (Invitrogen). 293T and PlatE cells were maintained in DMEM  
692 (Invitrogen) supplemented with 10% FBS (Invitrogen). Leukemic cells were co-cultivated in  
693 RPMI (Invitrogen) supplemented with 15% FBS, IL2 and IL7 (10ng/ml; Peprotech). *In vitro*  
694 activation of RC<sup>T2</sup> was performed by a 24h pulse treatment with 4-hydroxytamoxifen (4OHT,  
695 1 $\mu$ M, Sigma Aldrich).

696  
697 Retroviral-mediated gene transfer. The cDNAs encoding *CnB1* (*PPP3R1*)<sup>8</sup>, and the  
698 constitutively active mutant NFAT1 [2+5+8] and NFAT1 [2+5+8]-NLS (a generous gift of Dr  
699 A Rao)<sup>21</sup>, were subcloned into MigR1, allowing their co-expression with GFP. Retroviral  
700 stocks were obtained by transfection of the PlatE packaging cell line with the desired retroviral  
701 vector using Lipofectamine, following manufacturer's instructions (Lipofectamine 2000,  
702 Invitrogen). After 48 hours, the retroviral supernatant was collected and titrated on NIH3T3  
703 cells. tNGFR<sup>+</sup> ICN1 leukemic cells were spin-infected (1800g for 2 h at 30°C) at the same  
704 multiplicity of infection in the presence of 4 $\mu$ g/ml polybrene (Sigma-Aldrich). Following  
705 infection, leukemic cells were co-cultured on MS5 for 48-72 hours before flow cytometry  
706 sorting or immediately infused into syngeneic mice (1x10<sup>6</sup> cells/mouse) and expanded *in vivo*  
707 for further studies

708  
709 PCR genotyping, RNA extraction and RT-PCR analyses. Detection of the different alleles of  
710 *Nfat1*, *Nfat2* and *Nfat4* in genomic DNA of compound mice and leukemic cells was by PCR,  
711 using the following primers:

|                                  |                                                                                                      |
|----------------------------------|------------------------------------------------------------------------------------------------------|
| <i>NFAT2</i> <sup>flox/+</sup>   | 5'-CCA TCT CTC TGA CCA ACA GAA GCC AGC-3'<br>5'-CCT ATT TAA ACA CCT GGC TCC CTG CGT-3'               |
| <i>NFAT2</i> <sup>del</sup>      | 5'-CTA GGC CTG AGG CGT TCC ACC-3'<br>5'-CCT GCC TCT CTC AGC CTT TGA-3'                               |
| <i>NFAT4</i> <sup>flox/del</sup> | 5'-GCA AGA ACA GCA AGT GTA C-3'<br>5'-TTG ACC TCA ACA TTC TGG AG-3'<br>5'-CTG GTG ATG GTA GTG TAC-3' |
| <i>HSP70</i>                     | 5'-GCT GAG AAG CAC CAG GAT TC-3'<br>5'-CGG GGT CTC CTT TTC TGT CT-3'                                 |

712

713 Total RNA was extracted using the RNeasy kit (QIAGEN) and reverse transcribed using  
714 random primers and the kit ImProm II Reverse Transcription System (Promega) according to  
715 the manufacturer's instructions. The following primers were used for RT-PCR :

|               |                                                                          |
|---------------|--------------------------------------------------------------------------|
| <i>CDKN1A</i> | 5'-AGT GTC CCG TTG TCT CTT CG-3'<br>5'-ACA CCA GAG TGC AAG ACA AGC-3'    |
| <i>NR4A1</i>  | 5'-GGA AGC TCA TCT TCT GCT CAG-3'<br>5'-CCT TCA GAC AGC TAG CAA TGC G-3' |
| <i>Actin</i>  | 5'-GTG GGC CGC CCT AGG CAC CA-3'<br>5'-TCT TTG ATG TCA CGC ACG ATT TC-3' |

716

717 Western blot. Western blot analyses were performed as described <sup>6</sup>, using antibodies to NFAT2  
718 (sc-7294), NFAT1 (sc-7296), NFAT4 (sc-8321), STAT5 (sc-835) and SAM-68 (sc-333), all  
719 from Santa Cruz Biotechnology.

720

721

722

723
